# Supplementary material
Source: PubMed Central journal article supplement (PMC1868421)
Supplement: NIHMS16459-supplement.pdf [file NIHMS16459-supplement.pdf]

*Supporting Information*

**Symbiotic Reagent Activation: Oppenauer Oxidation of Magnesium Alkoxides by Silylglyoxylate Triggers Second-Stage Aldolization**

Xin Linghu, Andrew D. Satterfield and Jeffrey S. Johnson\*

*Department of Chemistry, University of North Carolina at Chapel Hill,*

*Chapel Hill, North Carolina 27599-3290*

jsj@unc.edu

**Table of Contents**

|                                                                          |         |
|--------------------------------------------------------------------------|---------|
| General Information                                                      | S2      |
| Representative Procedure for Optimizing Reaction Conditions              | S2-S3   |
| Direct Addition/Rearrangement Product (11)                               | S3      |
| Evaluation of Reaction Variables                                         | S3      |
| General Procedures, Spectral Data, and Stereochemical Proofs for Table 2 | S4-S14  |
| General Procedures, Spectral Data and Stereochemical Proofs for Table 3  | S14-S20 |
| Crossover Experiment                                                     | S20-S21 |
| Control Experiment for Crossover Study                                   | S21     |
| Appendix with Spectral Data                                              | S22-S38 |
| References                                                               | S39     |

**General Information.** Infrared (IR) spectra were obtained using a Nicolet 560-E.S.P. infrared spectrometer. Proton and carbon nuclear magnetic resonance spectra ( $^1\text{H}$  and  $^{13}\text{C}$  NMR) were recorded on the following instruments: Bruker model Avance 400 ( $^1\text{H}$  NMR at 400 MHz and  $^{13}\text{C}$  NMR at 100 MHz) and Varian Gemini 300 ( $^1\text{H}$  NMR at 300 MHz and  $^{13}\text{C}$  at 75 MHz) spectrometers with solvent resonance as the internal standard ( $^1\text{H}$  NMR:  $\text{CDCl}_3$  at 7.24 ppm and  $^{13}\text{C}$  NMR:  $\text{CDCl}_3$  at 77.0 ppm).  $^1\text{H}$  NMR data are reported as follows: chemical shift, multiplicity (s = singlet, d = doublet, t = triplet, q = quartet, quint = quintet, sep = septet, m = multiplet), coupling constants (Hz), and integration. Combustion analyses were performed by Atlantic Microlab Inc., Norcross, GA. Analytical thin layer chromatography (TLC) was performed on Whatman 0.25 mm silica gel 60 plates. Visualization was accomplished with UV light and aqueous ceric ammonium nitrate molybdate solution followed by heating. Purification of the reaction products was carried out by flash chromatography using Sorbent Technologies silica gel 60 (32-63  $\mu\text{m}$ ). All alcohols for general procedure (A) were distilled from magnesium prior to use. All alcohols for general procedure (C) were distilled from sodium prior to use. Aldehydes were extracted from an aq. sat.  $\text{NaHCO}_3$  solution with ether, concentrated, and distilled. THF was distilled from sodium and benzophenone. Analytical chromatography was performed on a Berger Supercritical Fluid Chromatograph (SFC) model FCM 1100/1200 equipped with an Agilent 1100 series UV-Vis detector. Silylglyoxylate **1** was prepared according to the literature procedure.<sup>1</sup> Yields and diastereomer ratios are reported for a specific experiment and as a result may differ slightly from those found in the tables, which are averages of at least two experiments.

**Representative Procedure (A) for the optimization of reaction conditions (Table 1).** A dry round-bottomed flask with a magnetic stir bar was charged with alcohol (1.5 equiv) and 2 mL of solvent. To the resulting solution, ethylmagnesium bromide (1.0 M in THF) (2.0 equiv) was added *via* syringe at 0 °C under an argon atmosphere. The reaction temperature was allowed to warm to 25 °C for 5 min. To the reaction solution was added dropwise *via* cannula the silylglyoxylate (1.0 equiv., ca. 0.4 mmol) in 2 mL of solvent. The reaction was stirred for 10 min before 5 mL of a saturated  $\text{NH}_4\text{Cl}$  solution and 15 mL of  $\text{Et}_2\text{O}$  were added. The organic layer was separated and the aqueous layer

was extracted with two 10 mL portions of Et<sub>2</sub>O. The organic extracts were combined, dried (Na<sub>2</sub>SO<sub>4</sub>), and the solvent was removed with a rotary evaporator. To the crude product was added a known quantity of 1,3,5-trimethoxybenzene as the internal standard, and the yield and the diastereomer ratio of the reaction were determined by <sup>1</sup>H NMR spectroscopy.

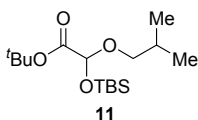

**tert-Butyl-2-tert-butyldimethylsilyloxy-2-isobutoxyacetate (11).** Analytical data for title compound: **IR** (thin film, cm<sup>-1</sup>) 2957, 2930, 2858, 1755, 1472, 1367, 1254, 1130, 1072, 839, 782; **<sup>1</sup>H NMR** (400 MHz, CDCl<sub>3</sub>) δ 4.94 (s, 1H), 3.32 (ABX, *J*<sub>AB</sub> = 8.8 Hz, *J*<sub>AX</sub> = 6.8 Hz, 2H), 1.87 (sep, *J* = 6.8 Hz, 1H), 1.48 (s, 9H), 0.92 (s, 9H), 0.91 (d, 6H, one peak overlapped with 0.92 peak), 0.135 (s, 3H), 0.131 (s, 3H); **<sup>13</sup>C NMR** (75 MHz, CDCl<sub>3</sub>) 168.0, 93.9, 81.6, 73.2, 28.4, 27.9, 25.63, 25.56, 19.3, 18.2, 17.5, -4.6, -4.8; For <sup>1</sup>H NMR spectrum, see the Appendix.

**Table S1.** Evaluation of Reaction Variables

| entry | <sup>t</sup> BuO-M                                            | <sup>t</sup> BuO <sub>2</sub> CC(O)SiR <sub>3</sub> | solvent                                   | yield <sup>a</sup> | <i>d.r.</i> <sup>b</sup> |
|-------|---------------------------------------------------------------|-----------------------------------------------------|-------------------------------------------|--------------------|--------------------------|
| 1     | Me <sub>2</sub> AlCl (1 equiv)/ <sup>t</sup> BuOH (1 equiv)   | <sup>t</sup> BuO <sub>2</sub> CC(O)TBS              | THF                                       | 0%                 | n.a.                     |
| 2     | Me <sub>2</sub> AlCl (0.5 equiv)/ <sup>t</sup> BuOH (1 equiv) | <sup>t</sup> BuO <sub>2</sub> CC(O)TBS              | THF                                       | 42%                | 5:1                      |
| 3     | <sup>t</sup> BuO-MgCl                                         | <sup>t</sup> BuO <sub>2</sub> CC(O)TBS              | THF                                       | ≈70%               | 4.8:1                    |
| 4     | <sup>t</sup> BuO-MgI                                          | <sup>t</sup> BuO <sub>2</sub> CC(O)TBS              | THF                                       | <20%               | 1:1                      |
| 5     | ( <sup>t</sup> PrO) <sub>4</sub> Ti                           | <sup>t</sup> BuO <sub>2</sub> CC(O)TBS              | THF                                       | <10%               | n.d.                     |
| 6     | <sup>t</sup> BuO-MgBr                                         | <sup>t</sup> BuO <sub>2</sub> CC(O)TES              | THF                                       | 30%                | 4.4:1                    |
| 7     | <sup>t</sup> BuO-MgBr                                         | <sup>t</sup> BuO <sub>2</sub> CC(O)TIPS             | THF                                       | 35%                | 3.7:1                    |
| 8     | <sup>t</sup> BuO-MgBr                                         | <sup>t</sup> BuO <sub>2</sub> CC(O)TBS              | Dioxane                                   | 26%                | 2.0:1                    |
| 9     | <sup>t</sup> BuO-MgBr                                         | <sup>t</sup> BuO <sub>2</sub> CC(O)TBS              | CH <sub>2</sub> Cl <sub>2</sub>           | 24%                | 8.0:1                    |
| 10    | <sup>t</sup> BuO-MgBr                                         | <sup>t</sup> BuO <sub>2</sub> CC(O)TBS              | Et <sub>2</sub> O                         | 36%                | 6.0:1                    |
| 11    | <sup>t</sup> BuO-MgBr                                         | <sup>t</sup> BuO <sub>2</sub> CC(O)TBS              | Toluene                                   | 34%                | 7.0:1                    |
| 12    | <sup>t</sup> BuO-MgBr                                         | <sup>t</sup> BuO <sub>2</sub> CC(O)TBS              | MTBE/THF (1:2)                            | 76%                | 7.6:1                    |
| 13    | <sup>t</sup> BuO-MgBr                                         | <sup>t</sup> BuO <sub>2</sub> CC(O)TBS              | MTBE                                      | 83%                | 5.6:1                    |
| 14    | <sup>t</sup> BuO-MgBr                                         | <sup>t</sup> BuO <sub>2</sub> CC(O)TBS              | 2-MeTHF                                   | n.r.               | n.a.                     |
| 15    | <sup>t</sup> BuO-MgBr                                         | <sup>t</sup> BuO <sub>2</sub> CC(O)TBS              | 2-MeTHF/THF (1:2)                         | 56%                | 7.4:1                    |
| 16    | <sup>t</sup> BuO-MgBr                                         | <sup>t</sup> BuO <sub>2</sub> CC(O)TBS              | Dioxane/THF (1:2)                         | 31%                | 2.8:1                    |
| 17    | <sup>t</sup> BuO-MgBr                                         | <sup>t</sup> BuO <sub>2</sub> CC(O)TBS              | THF/Et <sub>2</sub> O (2:1)               | 69%                | 9.1:1                    |
| 18    | <sup>t</sup> BuO-MgBr                                         | <sup>t</sup> BuO <sub>2</sub> CC(O)TBS              | THF/toluene (2:1)                         | 57%                | 10:1                     |
| 19    | <sup>t</sup> BuO-MgBr                                         | <sup>t</sup> BuO <sub>2</sub> CC(O)TBS              | THF/CH <sub>2</sub> Cl <sub>2</sub> (2:1) | >95%               | 10.6:1                   |

<sup>a</sup> <sup>1</sup>H NMR yield versus an internal standard. <sup>b</sup> Determined by <sup>1</sup>H NMR spectroscopy.

**General procedure (B) for tandem Oppenauer oxidation/Brook rearrangement/aldolization (Table 2).** A dry round bottomed flask with a magnetic stir bar was charged with alcohol (1.5 equiv), and 1-2 mL of solvent. To the resulting solution, ethylmagnesium bromide (1.0 M in THF) (1.75-2.0 equiv) was added *via* syringe at 0 °C under an argon atmosphere. The reaction temperature was allowed to warm to 25 °C for 5 min. To the reaction solution was added dropwise *via* cannula the silyl glyoxylate (1.0 equiv, ca. 0.4 mmol) in 1-2 mL of solvent. The reaction was stirred at the same temperature for 10 min before 5 mL of a saturated NH<sub>4</sub>Cl solution and 15 mL of Et<sub>2</sub>O or CH<sub>2</sub>Cl<sub>2</sub> were added. The organic layer was separated and the aqueous layer was extracted with two 10 mL portions of Et<sub>2</sub>O or CH<sub>2</sub>Cl<sub>2</sub>. The organic extracts were combined and dried (Na<sub>2</sub>SO<sub>4</sub>). Concentration of the organic phase by rotary evaporation afforded the crude product which was purified by flash chromatography using the specified solvent system.

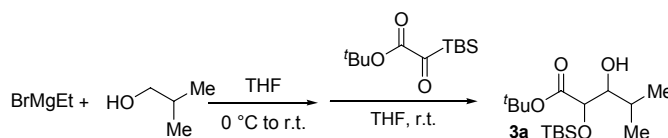

***tert*-Butyl-2-*tert*-butyldimethylsilyloxy-3-hydroxy-4-methylbutanoate (3a).** The title compound was prepared according to General Procedure **B** using 100 mg (0.41 mmol) of *tert*-butyl *tert*-butyldimethylsilyl glyoxylate in 1:1 (v/v) THF/CH<sub>2</sub>Cl<sub>2</sub> (1 mL), 46 mg (0.60 mmol) of isobutanol in 1:1 (v/v) THF/CH<sub>2</sub>Cl<sub>2</sub> (1 mL), and 0.7 mL (0.7 mmol) of EtMgBr (1 M in THF). The crude product was extracted with CH<sub>2</sub>Cl<sub>2</sub> and purified by flash chromatography with 15:1 hexanes/EtOAc to afford 123 mg (95%) of the product as a clear oil (10:1 ratio of two diastereomers). Analytical data for title compound: **IR** (thin film, cm<sup>-1</sup>) 3502 (br), 2962, 2936, 2859, 1750, 1473, 1392, 1368, 1289, 1253, 1144, 1005, 940, 877, 840, 778; **<sup>1</sup>H NMR** (300 MHz, CDCl<sub>3</sub>) (major diastereomer) δ 4.11 (d, *J* = 5.1 Hz, 1H), 3.46 (dd, *J* = 6.0, 5.1 Hz, 1H), 2.37 (br s, 1H), 1.81 (sep, *J* = 6.6 Hz, 1H), 1.46 (s, 9H), 0.96 (d, *J* = 6.9 Hz, 3H), 0.94 (d, *J* = 6.9 Hz, 3H), 0.89 (s, 9H), 0.082 (s, 3H), 0.051 (s, 3H); **<sup>13</sup>C NMR** (75 MHz, CDCl<sub>3</sub>) (major diastereomer) δ 171.0, 81.6, 78.7, 74.1, 29.5, 28.0, 25.7, 19.6, 18.2, 17.5, -4.7, -5.4; TLC (10:1 hexanes/EtOAc) *R<sub>f</sub>* of major

diastereomer 0.25,  $R_f$  of minor diastereomer 0.30; **Anal.** Calcd. for  $C_{16}H_{34}O_4Si$ : C, 60.33; H, 10.76. Found: C, 60.31; H, 10.78.

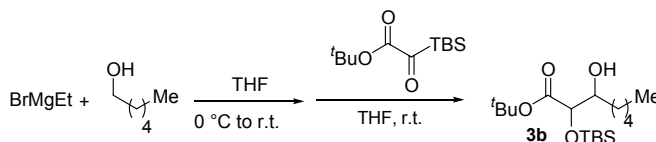

**tert-Butyl-2-tert-butyldimethylsilyloxy-3-hydroxyoctanoate (3b).** The title compound was prepared according to General Procedure **B** using 100 mg (0.41 mmol) of *tert*-butyl *tert*-butyldimethylsilyl glyoxylate in 1:1 (v/v) THF/ $CH_2Cl_2$  (1 mL), 63 mg (0.61 mmol) of hexanol in 1:1 (v/v) THF/ $CH_2Cl_2$  (1 mL), and 0.7 mL (0.7 mmol) of EtMgBr (1 M in THF). The crude product was extracted with  $CH_2Cl_2$  and purified by flash chromatography with 17:1 hexanes/EtOAc to afford 126 mg (89%) of the product as a clear oil (7.5:1 ratio of two diastereomers). Analytical data for title compound: **IR** (thin film,  $cm^{-1}$ ) 3476 (br), 2955, 2930, 2858, 1750, 1472, 1368, 1254, 1145, 874, 838, 780;  **$^1H$  NMR** (400 MHz,  $CDCl_3$ ) (major diastereomer)  $\delta$  4.03 (d,  $J = 4.4$  Hz, 1H), 3.74 (br m, 1H), 2.25 (br s, 1H), 1.46 (s, 9H), 1.48-1.40 (underneath the peak of 1.46, 2H) 1.36-1.33 (m, 6H), 0.89 (s, 9H), 0.87 (t,  $J = 6.8$  Hz, 3H), 0.085 (s, 3H), 0.048 (s, 3H);  **$^{13}C$  NMR** (100 MHz,  $CDCl_3$ ) (major diastereomer)  $\delta$  170.8, 81.5, 75.7, 73.5, 31.9, 31.7, 28.0, 25.7, 25.3, 22.5, 18.2, 14.0, -4.7, -5.4; TLC (15:1 hexanes/EtOAc)  $R_f$  0.25; **Anal.** Calcd. for  $C_{18}H_{38}O_4Si$ : C, 62.38; H, 11.05. Found: C, 62.75; H, 10.93.

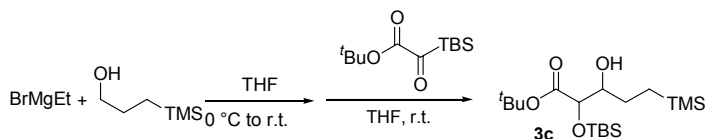

**tert-Butyl-2-tert-butyldimethylsilyloxy-3-hydroxy-5-trimethylsilylpentanoate (3c).** The title compound was prepared according to General Procedure **B** using 100 mg (0.41 mmol) of *tert*-butyl *tert*-butyldimethylsilyl glyoxylate in 1:1 (v/v) THF/ $CH_2Cl_2$  (1 mL), 81 mg (0.61 mmol) of 3-trimethylsilylpropanol in 1:1 (v/v) THF/ $CH_2Cl_2$  (1 mL), and 0.7 mL (0.7 mmol) of EtMgBr (1 M in THF). The crude product was extracted with  $CH_2Cl_2$  and purified by flash chromatography with 17:1 hexanes/EtOAc to afford 130 mg (84%) of the product as a clear oil (5:1 ratio of two diastereomers). Analytical data for title

compound: **IR** (thin film,  $\text{cm}^{-1}$ ) 3495 (br), 2952, 2930, 2859, 1748, 1724, 1472, 1368, 1250, 1146, 862, 838, 779;  **$^1\text{H}$  NMR** (300 MHz,  $\text{CDCl}_3$ ) (major diastereomer)  $\delta$  4.04 (d,  $J = 4.5$  Hz, 1H), 3.66 (quint,  $J = 4.5$  Hz, 1H), 2.33 (br s, 1H), 1.45 (s, 9H), 0.90 (s, 9H), 0.75-0.63 (m, 2H), 0.50-0.38 (m, 2H), 0.085 (s, 3H), 0.050 (s, 3H), -0.035 (s, 9H);  **$^{13}\text{C}$  NMR** (75 MHz,  $\text{CDCl}_3$ ) (major diastereomer)  $\delta$  170.9, 81.5, 76.0, 75.4, 28.0, 26.4, 25.7, 18.2, 12.1, -1.86, -4.7, -5.4; TLC (15:1 hexanes/EtOAc)  $R_f$  0.25; **Anal.** Calcd. for  $\text{C}_{18}\text{H}_{40}\text{O}_4\text{Si}_2$ : C, 57.39; H, 10.70. Found: C, 57.71; H, 10.51.

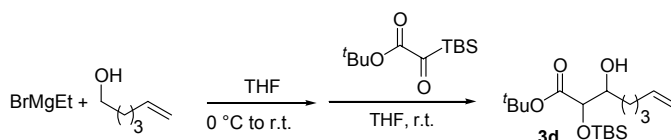

***tert*-Butyl-2-*tert*-butyldimethylsilyloxy-3-hydroxyoct-7-enoate (3d).** The title compound was prepared according to General Procedure **B** using 95 mg (0.39 mmol) of *tert*-butyl *tert*-butyldimethylsilyl glyoxylate in THF (2 mL), 58 mg (0.58 mmol) of hex-5-en-1-ol in THF (2 mL), and 0.78 mL (0.78 mmol) of EtMgBr (1 M in THF). The crude product was extracted with  $\text{Et}_2\text{O}$  and purified by flash chromatography with 17:1 hexanes/EtOAc to afford 84 mg (63%) of the product as a clear oil (5:1 ratio of two diastereomers). Analytical data for title compound: **IR** (thin film,  $\text{cm}^{-1}$ ) 3562, 3493 (br), 3077, 2952, 2931, 2859, 1750, 1725, 1472, 1368, 1253, 1144, 871, 838, 780;  **$^1\text{H}$  NMR** (400 MHz,  $\text{CDCl}_3$ ) (major diastereomer)  $\delta$  5.77 (dddd,  $J = 17.2, 10.4, 6.8, 6.8$  Hz, 1H), 4.99 (ddd,  $J = 17.2, 2.0, 1.6$  Hz, 1H), 4.92 (ddd,  $J = 10.4, 1.6, 0.8$  Hz, 1H), 4.03 (d,  $J = 4.8$  Hz, 1H), 3.81-3.70 (m, 1H), 2.26 (br s, 1H), 2.11-2.00 (m, 2H), 1.65-1.40 (m, 4H), 1.45 (s, 9H), 0.90 (s, 9H), 0.087 (s, 3H), 0.049 (s, 3H);  **$^{13}\text{C}$  NMR** (100 MHz,  $\text{CDCl}_3$ ) (major diastereomer)  $\delta$  170.6, 138.4, 114.4, 81.4, 75.5, 73.1, 33.4, 31.2, 27.8, 25.5, 24.7, 18.1, -5.0, -5.6; TLC (15:1 hexanes/EtOAc)  $R_f$  0.25; **Anal.** Calcd. for  $\text{C}_{18}\text{H}_{36}\text{O}_4\text{Si}$ : C, 62.74; H, 10.53. Found: C, 62.92; H, 10.66.

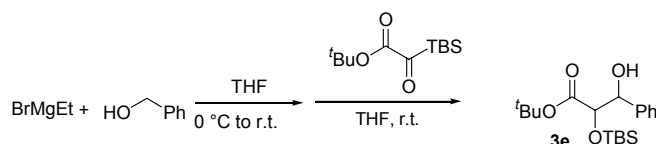

***tert*-Butyl-2-*tert*-butyldimethylsilyloxy-3-hydroxy-3-phenylpropanoate (3e).** The title compound was prepared according to General Procedure **B** using 93 mg (0.38 mmol) of *tert*-butyl *tert*-butyldimethylsilyl glyoxylate in THF (2 mL), 62 mg (0.57 mmol) of benzyl alcohol in THF (2 mL), and 0.76 mL (0.76 mmol) of EtMgBr (1 M in THF). The crude product was extracted with Et<sub>2</sub>O and purified by flash chromatography with 15:1 hexanes/EtOAc to afford 121 mg (90%) of the product as a clear oil (1.2:1 ratio of two diastereomers). Analytical data for title compound: **IR** (thin film, cm<sup>-1</sup>) 3479 (br), 2954, 2931, 2895, 2858, 1744, 1472, 1368, 1255, 1136, 1056, 876, 837, 780, 700; **<sup>1</sup>H NMR** (300 MHz, CDCl<sub>3</sub>) (inseparable diastereomers) δ 7.42-7.22 (m, 10H; two diastereomers), 4.95 (dd, *J* = 6.9, 3.9 Hz, 1H; minor diastereomer), 4.85 (dd, *J* = 6.0, 3.6 Hz, 1H; major diastereomer), 4.182 (d, *J* = 3.9 Hz, 1H; minor diastereomer), 4.179 (d, *J* = 6.0 Hz, 1H; major diastereomer), 3.11 (d, *J* = 3.6 Hz, 1H; major diastereomer), 3.08 (d, *J* = 6.9 Hz, 1H; minor diastereomer), 1.42 (s, 9H; minor diastereomer), 1.38 (s, 9H; major diastereomer), 0.85 (s, 9H; major diastereomer), 0.83 (s, 9H; minor diastereomer), 0.009 (s, 3H; major diastereomer), -0.027 (s, 3H; minor diastereomer), -0.181 (s, 3H; major diastereomer), -0.187 (s, 3H; minor diastereomer); **<sup>13</sup>C NMR** (75 MHz, CDCl<sub>3</sub>) (inseparable diastereomers) δ 170.8, 170.5, 140.4, 139.9, 127.9, 127.8, 127.6, 127.2, 126.3, 81.7, 76.4, 75.6, 75.4, 75.2, 27.8, 25.63, 25.57, 25.52, 25.4, 18.1, 18.0, -5.0, -5.2, -5.8 (two coincident resonances in the 126-128 ppm region, two coincident resonances in the 75-82 ppm region, two coincident resonances in the 18-28 ppm region, and two coincident resonances in the -6 to -5 region) TLC (10:1 hexanes/EtOAc) R<sub>f</sub> 0.25; **Anal.** Calcd. for C<sub>19</sub>H<sub>32</sub>O<sub>4</sub>Si: C, 64.73; H, 9.15. Found: C, 64.70; H, 9.24.

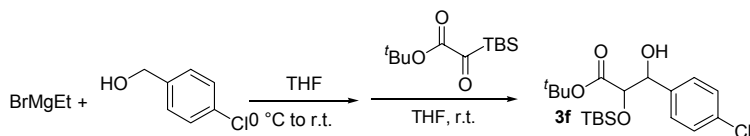

***tert*-Butyl-2-*tert*-butyldimethylsilyloxy-3-hydroxy-3-(4-chlorophenyl)propanoate (3f).** The title compound was prepared according to General Procedure **B** using 99 mg

(0.41 mmol) of *tert*-butyl *tert*-butyldimethylsilyl glyoxylate in THF (2 mL), 87 mg (0.61 mmol) of 4-chlorobenzyl alcohol (2 mL), and 0.82 mL (0.82 mmol) of EtMgBr (1 M in THF). The crude product was extracted with Et<sub>2</sub>O and purified by flash chromatography with 12:1 hexanes/EtOAc to afford 130 mg (82%) of the product as a clear oil (1:1 ratio of two diastereomers). Analytical data for title compound: **IR** (thin film, cm<sup>-1</sup>) 3471 (br), 2957, 2930, 2887, 2858, 1743, 1492, 1472, 1368, 1253, 1136, 1091, 877, 837, 780; **<sup>1</sup>H NMR** (400 MHz, CDCl<sub>3</sub>) (inseparable diastereomers) δ 7.33-7.24 (m, 8H), 4.87 (dd, *J* = 6.4, 3.6 Hz, 1H), 4.79 (dd, *J* = 5.6, 3.2 Hz, 1H), 4.11 (d, *J* = 4.0 Hz, 1H), 4.10 (d, *J* = 6.0 Hz, 1H), 3.18 (d, *J* = 3.2 Hz, 1H), 3.10 (d, *J* = 7.2 Hz, 1H), 1.39 (s, 9H), 1.35 (s, 9H), 0.83 (s, 9H), 0.80 (s, 9H), -0.01 (s, 3H), -0.04 (s, 3H), -0.19 (s, 3H), -0.21 (s, 3H); **<sup>13</sup>C NMR** (100 MHz, CDCl<sub>3</sub>) (inseparable diastereomers) δ 170.6, 170.4, 139.0, 138.5, 133.5, 133.3, 128.6, 128.1, 128.0, 127.8, 82.00, 81.98, 76.9, 76.3, 74.8, 74.7, 28.0, 27.84, 27.81, 25.7, 25.6, 25.5, 18.09, 18.04, -5.1, -5.2, -5.7, -5.8; TLC (10:1 hexanes/EtOAc) R<sub>f</sub> 0.25; **Anal.** Calcd. for C<sub>19</sub>H<sub>31</sub>ClO<sub>4</sub>Si: C, 58.97; H, 8.07. Found: C, 59.21; H, 8.14.

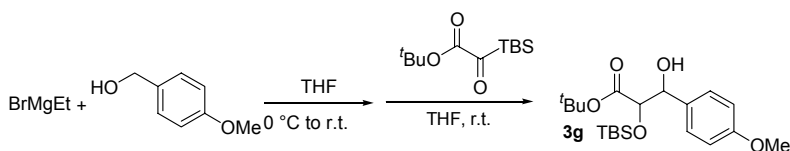

***tert*-Butyl-2-*tert*-butyldimethylsilyloxy-3-hydroxy-3-(4-methoxy)phenylpropanoate**

**(3g).** The title compound was prepared according to General Procedure **B** using 96 mg (0.39 mmol) of *tert*-butyl *tert*-butyldimethylsilyl glyoxylate in THF (2 mL), 81 mg (0.59 mmol) of 4-methoxybenzyl alcohol in THF (2 mL), and 0.78 mL (0.78 mmol) of EtMgBr (1 M in THF). The crude product was extracted with Et<sub>2</sub>O and purified by flash chromatography with 11:1 hexanes/EtOAc to afford 126 mg (85%) of the product as a clear oil (1:1 ratio of two diastereomers). Analytical data for title compound: **IR** (thin film, cm<sup>-1</sup>) 3492 (br), 2959, 2930, 2858, 1738, 1613, 1514, 1472, 1367, 1303, 1250, 1137, 1037, 876, 833, 780, 733; **<sup>1</sup>H NMR** (300 MHz, CDCl<sub>3</sub>) (inseparable diastereomers) δ 7.33-7.22 (m, 4H), 6.90-6.81 (m, 4H), 4.84 (br t, 1H), 4.77 (br d, *J* = 5.7 Hz, 1H), 4.14 (d, *J* = 6.3 Hz, 1H), 4.11 (d, *J* = 4.2 Hz), 3.783 (s, 3H), 3.780 (s, 3H), 3.00 (br s, 2H), 1.38 (s, 9H), 1.37 (s, 9H), 0.84 (s, 18H), -0.008 (s, 3H), -0.026 (s, 3H), -0.15 (s, 3H), -0.18 (s, 3H); **<sup>13</sup>C NMR** (75 MHz, CDCl<sub>3</sub>) (inseparable diastereomers) δ 170.9, 170.6,



159.3, 159.2, 132.3, 132.2, 128.4, 127.7, 113.5, 113.4, 81.66, 81.62, 76.4, 75.2, 74.9, 55.3, 55.2, 27.8, 25.7, 25.5, 25.4, 18.13, 18.06, -5.6, -5.8 (two coincident resonances in the 74-78 ppm region, three coincident resonances in the 25-28 ppm region, and two coincident resonances in the -5 to -6 ppm region); TLC (10:1 hexanes/EtOAc)  $R_f$  0.18; **Anal.** Calcd. for  $C_{20}H_{34}O_5Si$ : C, 62.79; H, 8.96. Found: C, 62.92; H, 8.96.

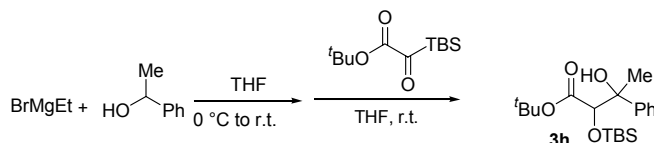

**tert-Butyl-2-tert-butyldimethylsilyloxy-3-hydroxy-3-phenylbutanoate (3h).** The title compound was prepared according to General Procedure **B** using 103 mg (0.42 mmol) of *tert*-butyl *tert*-butyldimethylsilyl glyoxylate in THF (2 mL), 77 mg (0.63 mmol) of 1-phenylethanol in THF (2 mL), and 0.84 mL (0.84 mmol) of EtMgBr. The crude product was extracted with Et<sub>2</sub>O and purified by flash chromatography with 17:1 hexanes/EtOAc to afford 103 mg (67%) of the product as a clear oil (2.5:1 ratio of two diastereomers). Analytical data for title compound: **IR** (thin film,  $cm^{-1}$ ) 3483 (br), 2955, 2932, 2895, 2859, 1742, 1472, 1368, 1258, 1132, 1068, 876, 838, 781, 700; **<sup>1</sup>H NMR** (300 MHz, CDCl<sub>3</sub>) (major diastereomer)  $\delta$  7.55-7.40 (m, 2H), 7.34-7.20 (m, 3H), 4.20 (s, 1H), 3.74 (s, 1H), 1.55 (s, 3H), 1.33 (s, 9H), 0.85 (s, 9H), -0.014 (s, 3H), -0.154 (s, 3H); **<sup>13</sup>C NMR** (75 MHz, CDCl<sub>3</sub>) (major diastereomer)  $\delta$  171.3, 145.6, 128.0, 127.1, 125.8, 82.3, 79.6, 76.1, 28.0, 26.4, 25.9, 18.2, -5.1, -5.8 TLC (10:1 hexanes/EtOAc)  $R_f$  0.28; Calcd. for  $C_{20}H_{34}O_4Si$ : C, 65.53; H, 9.35. Found: C, 65.57; H, 9.31.

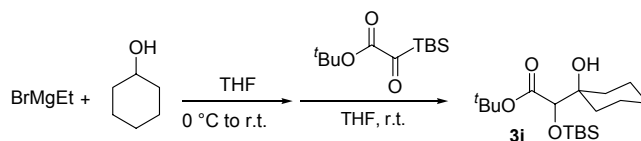

**tert-Butyl 2-tert-butyldimethylsilyloxy-2-(1-hydroxycyclohexyl) acetate (3i).** The title compound was prepared according to General Procedure **B** using 103 mg (0.42 mmol) of *tert*-butyl *tert*-butyldimethylsilyl glyoxylate in THF (2 mL), 63 mg (0.63 mmol) of cyclohexanol in THF (2 mL), and 0.84 mL (0.84 mmol) of EtMgBr (1 M in THF). The crude product was extracted with Et<sub>2</sub>O and purified by flash chromatography with 17:1 hexanes/EtOAc to afford 98 mg (68%) of the product as white crystals. Analytical data

for title compound: **IR** (thin film,  $\text{cm}^{-1}$ ) 3573, 3505 (br), 2936, 2856, 1745, 1723, 1472, 1367, 1252, 1130, 877, 838, 778;  **$^1\text{H}$  NMR** (300 MHz,  $\text{CDCl}_3$ )  $\delta$  3.86 (s, 1H), 2.69 (s, 1H), 1.70-1.11 (m, 10H), 1.48 (s, 9H), 0.88 (s, 9H), 0.077 (s, 3H), 0.058 (s, 3H);  **$^{13}\text{C}$  NMR** (75 MHz,  $\text{CDCl}_3$ )  $\delta$  171.1, 81.6, 78.2, 72.9, 33.8, 33.4, 28.0, 25.8, 25.7, 21.7, 21.6, 22.5, 18.1, -4.9, -5.4; TLC (15:1 hexanes/EtOAc)  $R_f$  0.25; mp 56.5-58.5  $^\circ\text{C}$ ; **Anal.** Calcd. for  $\text{C}_{18}\text{H}_{36}\text{O}_4\text{Si}$ : C, 62.74; H, 10.53. Found: C, 62.67; H, 10.41.

**General Procedure (C) for TBS ether deprotection (stereochemical proofs for Table 2).** A round-bottomed flask with a magnetic stir bar was charged with silyloxy ester **3** (1.0 equiv) and 4 mL of THF. To the resulting solution was added 1 mL of HF solution (49% in  $\text{H}_2\text{O}$ ) at 25  $^\circ\text{C}$ . The reaction was stirred at the same temperature for 36 h. The reaction was carefully poured into a saturated  $\text{NaHCO}_3$  solution, and then 15 mL of  $\text{Et}_2\text{O}$  were added. The organic layer was separated and the aqueous layer was extracted with two 15 mL portions of  $\text{Et}_2\text{O}$ . The organic extracts were combined, dried ( $\text{Na}_2\text{SO}_4$ ), and the solvent was removed with a rotary evaporator. The crude product was purified by flash chromatography using the specified solvent system.

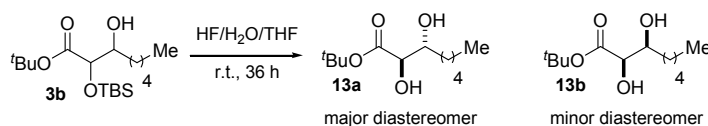

**tert-Butyl-2,3-dihydroxyoctanoate (13).** The title compound was prepared according to General Procedure C using 95 mg (0.27 mmol) of silyloxy ester **3b** as a 4:1 ratio of two diastereomers, 5 mL of THF, and 1 mL of HF solution (49% in  $\text{H}_2\text{O}$ ). The crude product was purified by flash chromatography with 4:1 hexanes/EtOAc to afford 44 mg (67%) of major diastereomer **13a** and 11 mg (16%) of minor diastereomer **13b** as a clear oil. Analytical data for major diastereomer **13a**:  **$^1\text{H}$  NMR** (400 MHz,  $\text{CDCl}_3$ )  $\delta$  4.10 (dd,  $J = 5.6, 4.0$  Hz, 1H), 3.85-3.76 (m, 1H), 3.14 (d,  $J = 5.6$  Hz, 1H), 2.29 (d,  $J = 6.8$  Hz, 1H), 1.49 (s, 9H), 1.44-1.22 (m, 8H), 0.88 (t,  $J = 6.8$  Hz, 3H);  **$^{13}\text{C}$  NMR** (100 MHz,  $\text{CDCl}_3$ )  $\delta$  172.0, 83.1, 74.0, 73.2, 31.7, 31.5, 28.0, 25.4, 22.5, 14.0; TLC (3:1 hexanes/EtOAc)  $R_f$  0.20. Analytical data for minor diastereomer **13b**:  **$^1\text{H}$  NMR** (400 MHz,  $\text{CDCl}_3$ )  $\delta$  3.96 (dd,  $J = 3.6, 2.0$  Hz, 1H), 3.87-3.77 (br m, 1H), 3.07 (d,  $J = 4.8$  Hz, 1H), 1.84 (d,  $J = 9.2$

Hz, 1H), 1.58 (m, 2H), 1.51 (s, 9H), 1.38-1.28 (m, 6H), 0.90 (t,  $J = 6.8$  Hz, 3H);  $^{13}\text{C}$  NMR (100 MHz,  $\text{CDCl}_3$ )  $\delta$  172.9, 83.1, 73.1, 72.7, 33.9, 31.7, 28.0, 25.4, 22.6, 14.0; TLC (3:1 hexanes/EtOAc)  $R_f$  0.30. Both  $^1\text{H}$  NMR and  $^{13}\text{C}$  NMR data for minor diastereomer **13b** exactly match with *syn tert*-butyl-2,3-dihydroxyoctanoate reported in the literature.<sup>2</sup> For  $^1\text{H}$  NMR data for both diastereomers, see the Appendix.

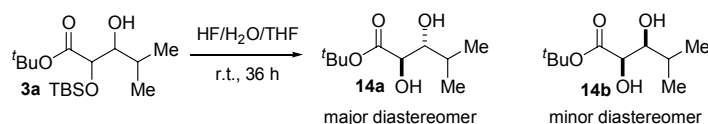

***tert*-Butyl-2,3-dihydroxy-4-methylpentanoate (14).** The title compound was prepared according to General Procedure C using 66 mg (0.21 mmol) of silyloxy ester **3a**, 4 mL of THF, and 1 mL of HF solution (49% in  $\text{H}_2\text{O}$ ). The crude product was purified by flash chromatography with 5:1 hexanes/EtOAc to afford 24 mg (56%) of two diastereomers **14a** and **14b** as a clear oil. Analytical data for major diastereomer **14a**: IR (thin film,  $\text{cm}^{-1}$ ) 3433 (br), 2980, 2935, 2873, 1729, 1475, 1394, 1369, 1252, 1163, 1082, 1054, 848;  $^1\text{H}$  NMR (400 MHz,  $\text{CDCl}_3$ )  $\delta$  4.12 (d,  $J = 4.0$  Hz, 1H), 3.44 (dd,  $J = 7.6, 4.4$  Hz, 1H), 3.27 (s (br), 1H), 2.56 (s (br), 1H), 1.95-1.80 (m, 1H), 1.49 (s, 9H), 1.00 (d,  $J = 6.8$  Hz, 3H), 0.97 (d,  $J = 6.8$  Hz, 3H);  $^{13}\text{C}$  NMR (100 MHz,  $\text{CDCl}_3$ )  $\delta$  172.4, 83.3, 78.8, 72.4, 30.1, 28.0, 19.2, 18.6; TLC (5:1 hexanes/EtOAc)  $R_f$  0.20.

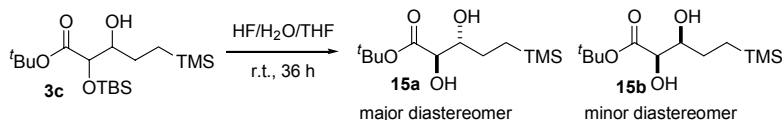

***tert*-Butyl-2,3-dihydroxy-5-trimethylsilylpentanoate (15).** The title compound was prepared according to General Procedure C using 66 mg (0.18 mmol) of silyloxy ester **3c**, 4 mL of THF, and 1 mL of HF solution (49% in  $\text{H}_2\text{O}$ ). The crude product was purified by flash chromatography with 5:1 hexanes/EtOAc to afford 24 mg (52%) of major diastereomer **15a** and 10 mg (22%) of minor diastereomer **15b** as a clear oil. Analytical data for major diastereomer **15a**: IR (thin film,  $\text{cm}^{-1}$ ) 3436 (br), 2979, 2947,

1726, 1458, 1394, 1368, 1254, 1163, 1076, 860, 756;  $^1\text{H NMR}$  (400 MHz,  $\text{CDCl}_3$ )  $\delta$  4.12 (dd,  $J = 5.2, 4.0$  Hz, 1H), 3.76-3.67 (m, 1H), 3.09 (d,  $J = 5.6$  Hz, 1H), 2.22 (d,  $J = 6.0$  Hz, 1H), 1.55-1.42 (m, 2H), 1.50 (s, 9H), 0.73 (ddd,  $J = 14.0, 11.6, 5.2$  Hz, 1H), 0.46 (ddd,  $J = 14.0, 12.4, 5.2$  Hz, 1H), -0.1 (s, 9H);  $^{13}\text{C NMR}$  (100 MHz,  $\text{CDCl}_3$ )  $\delta$  172.1, 83.2, 75.8, 73.6, 28.1, 26.1, 12.4, -1.8; TLC (5:1 hexanes/EtOAc)  $R_f$  0.22.

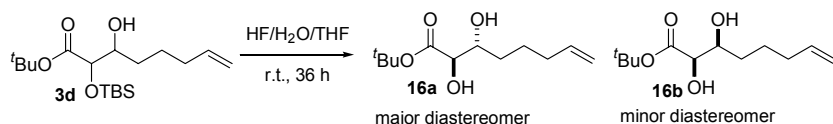

**tert-Butyl-2,3-dihydroxyoct-7-enoate (16).** The title compound was prepared according to General Procedure C using 46 mg (0.13 mmol) of silyloxy ester **3d**, 3 mL of THF, and 1 mL of HF solution (49% in H<sub>2</sub>O). The crude product was purified by flash chromatography with 7:1 hexanes/EtOAc to afford 19 mg (61%) of major diastereomer **16a** and 4 mg (13%) of minor diastereomer **16b** as a clear oil. Analytical data for major diastereomer **16a**: IR (thin film,  $\text{cm}^{-1}$ ) 3437 (br), 3077, 2979, 2935, 2861, 1731, 1641, 1458, 1394, 1369, 1254, 1162, 1131, 1082, 909, 849;  $^1\text{H NMR}$  (400 MHz,  $\text{CDCl}_3$ )  $\delta$  5.80 (ddt,  $J = 10.4, 6.8, 6.8$  Hz, 1H), 5.05-4.93 (m, 2H), 4.10 (dd,  $J = 5.2, 4.0$  Hz, 1H), 3.85-3.77 (m, 1H), 3.09 (d,  $J = 5.2$  Hz, 1H), 2.22 (d,  $J = 6.8$  Hz, 1H), 2.14-2.04 (m, 2H), 1.68-1.38 (m, 4H), 1.50 (s, 9H);  $^{13}\text{C NMR}$  (100 MHz,  $\text{CDCl}_3$ )  $\delta$  172.0, 138.4, 114.8, 83.3, 73.9, 73.0, 33.5, 31.0, 28.0, 24.9; TLC (7:1 hexanes/EtOAc)  $R_f$  0.17.

**General Procedure (D) for ketalization.** The major diastereomer of the dihydroxy ester (**14a**, **15a** or **16a**) (1.0 equiv) was dissolved in 3 mL of a 1:1 mixture of 2,2-dimethoxypropane:acetone and was treated with ( $\pm$ )-10-camphorsulfonic acid (CSA) (0.5 equiv). After 12 h, the reaction was partitioned between H<sub>2</sub>O (5 mL) and Et<sub>2</sub>O (5 mL). The organic layer was dried ( $\text{MgSO}_4$ ) and concentrated to give the crude acetonide product which was purified by flash chromatography using the indicated solvent system.

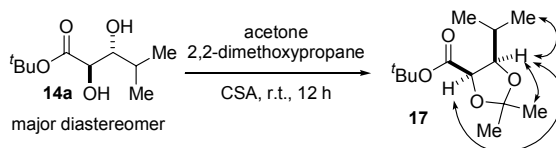

**2,2-Dimethyl-5-isopropyl-[1,3]dioxolane-4-carboxylic acid *tert*-butyl ester (17).**

The title compound was prepared according to General Procedure **D** using 23 mg (0.11 mmol) of the major diastereomer of dihydroxy ester **14a**, 3 mL of a 1:1 mixture of 2,2-dimethoxypropane:acetone and 12 mg (0.05 mmol) of CSA. The crude product was purified by flash chromatography with 15:1 hexanes/EtOAc to afford 25 mg (93%) of ketal **17** as a clear oil. Analytical data for major diastereomer **17**: **IR** (thin film,  $\text{cm}^{-1}$ ) 2971, 2938, 2876, 1750, 1724, 1458, 1368, 1246, 1214, 1153, 1088, 877;  **$^1\text{H}$  NMR** (400 MHz,  $\text{CDCl}_3$ )  $\delta$  4.42 (d,  $J = 6.4$  Hz, 1H), 3.85 (dd,  $J = 9.6, 6.4$  Hz, 1H), 1.80-1.71 (m, 1H), 1.61 (s, 3H), 1.48 (s, 9H), 1.35 (s, 3H), 1.03 (d,  $J = 6.4$  Hz, 3H), 0.99 (d,  $J = 6.8$  Hz, 3H);  **$^{13}\text{C}$  NMR** (100 MHz,  $\text{CDCl}_3$ )  $\delta$  169.9, 109.9, 84.1, 81.7, 77.5, 28.7, 28.0, 26.7, 25.7, 20.1, 19.5; TLC (10:1 hexanes/EtOAc)  $R_f$  0.30. See the Appendix for  $^1\text{H}$  NMR and NOESY spectra of **17**.

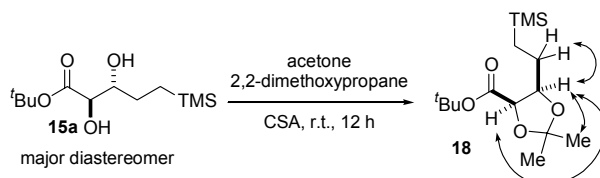

**2,2-Dimethyl-5-(2-trimethylsilylethyl)-[1,3]dioxolane-4-carboxylic acid *tert*-butyl ester (18).** The title compound was prepared according to General Procedure **D** using 24 mg (0.09 mmol) of the major diastereomer of dihydroxy ester **15a**, 3 mL of a 1:1 mixture of 2,2-dimethoxypropane:acetone and 10 mg (0.04 mmol) of CSA. The crude product was purified by flash chromatography with 15:1 hexanes/EtOAc to afford 23 mg (85%) of ketal **18** as a clear oil. Analytical data for major diastereomer **18**: **IR** (thin film,  $\text{cm}^{-1}$ ) 2981, 2953, 1754, 1724, 1368, 1249, 1216, 1157, 1092, 859, 838;  **$^1\text{H}$  NMR** (400 MHz,  $\text{CDCl}_3$ )  $\delta$  4.43 (d,  $J = 6.8$  Hz, 1H), 4.21 (ddd,  $J = 8.4, 6.8, 4.8$  Hz, 1H), 1.60-1.40 (m, 2H), 1.60 (s, 3H), 1.48 (s, 9H), 1.32 (s, 3H), 0.74 (ddd,  $J = 14.0, 12.4, 5.2$  Hz, 1H), 0.56 (ddd,  $J = 14.0, 12.4, 5.2$  Hz, 1H), -0.1 (s, 9H);  **$^{13}\text{C}$  NMR** (100 MHz,  $\text{CDCl}_3$ )  $\delta$  169.5, 110.0, 81.8, 80.6, 77.7, 28.1, 27.1, 25.7, 24.8, 13.2, -1.8; TLC (10:1 hexanes/EtOAc)  $R_f$  0.20. See the Appendix for  $^1\text{H}$  NMR and NOESY spectra of **18**.

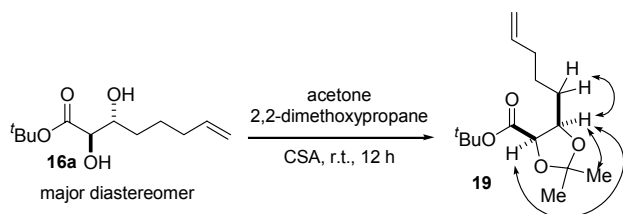

**2,2-Dimethyl-5-(pent-4-enyl)-[1,3]dioxolane-4-carboxylic acid *tert*-butyl ester (19).** The title compound was prepared according to General Procedure **D** using 19 mg (0.08 mmol) of the major diastereomer of dihydroxy ester **16a**, 3 mL of a 1:1 mixture of 2,2-dimethoxypropane:acetone and 9 mg (0.04 mmol) of CSA. The crude product was purified by flash chromatography with 15:1 hexanes/EtOAc to afford 18 mg (82%) of ketal **19** as a clear oil. Analytical data for major diastereomer **19**: **IR** (thin film,  $\text{cm}^{-1}$ ) 3078, 2981, 2938, 2870, 1752, 1724, 1641, 1458, 1368, 1251, 1215, 1158, 1092, 911, 878, 846;  **$^1\text{H}$  NMR** (400 MHz,  $\text{CDCl}_3$ )  $\delta$  5.79 (ddt,  $J = 10.0, 6.8, 6.8$  Hz, 1H), 5.06-4.93 (m, 2H), 4.41 (d,  $J = 6.8$  Hz, 1H), 4.33-4.23 (m, 1H), 2.14-2.06 (m, 2H), 1.68-1.46 (m, 4H), 1.59, (s, 3H), 1.47 (s, 9H), 1.35 (s, 3H);  **$^{13}\text{C}$  NMR** (100 MHz,  $\text{CDCl}_3$ )  $\delta$  169.5, 138.3, 114.9, 110.1, 81.9, 77.8, 77.6, 33.6, 29.7, 28.1, 27.1, 25.7, 25.6; TLC (10:1 hexanes/EtOAc)  $R_f$  0.30. See the Appendix for  $^1\text{H}$  NMR and NOESY spectra of **19**.

**General procedure (E) for reactions in Table 3.** A dry round bottomed flask with a magnetic stir bar was charged with aldehyde (1.5 equiv), and 2 mL of THF. To the resulting solution, alkylmagnesium bromide (1.0 M in THF) (2.0 equiv) was added *via* syringe at 0 °C under an argon atmosphere. The reaction temperature was allowed to warm to 25 °C for 5 min. To the reaction solution was added dropwise *via* cannula silylglyoxylate (1.0 equiv, ca. 0.4 mmol) in 2 mL of THF. The reaction was stirred at the same temperature for 10 min before 5 mL of a saturated  $\text{NH}_4\text{Cl}$  solution and 15 mL of  $\text{Et}_2\text{O}$  were added. The organic layer was separated and the aqueous layer was extracted with two 10 mL portions of  $\text{Et}_2\text{O}$ . The organic extracts were combined and dried ( $\text{Na}_2\text{SO}_4$ ). Concentration of the organic phase by rotary evaporation afforded the crude product which was purified by flash chromatography using the specified solvent system.

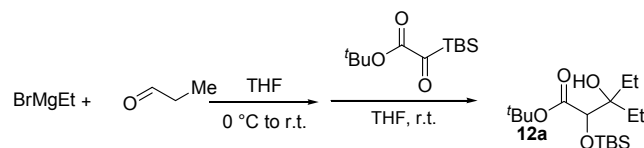

***Tert*-butyl 2-(*tert*-butyldimethylsilyloxy)-3-ethyl-3-hydroxypentanoate (12a).** The title compound was prepared according to General Procedure **E** using 100 mg (0.41 mmol) of *tert*-butyl *tert*-butyldimethylsilyl glyoxylate in THF (2 mL), 36 mg (0.61 mmol) of propanal in THF (2 mL), and 0.82 mL (0.82 mmol) of EtMgBr (1 M in THF). The crude product was purified by flash chromatography with 30:1-20:1 hexanes/EtOAc to afford 93 mg (68%) of the product as a clear oil. Analytical data for title compound: **IR** (thin film,  $\text{cm}^{-1}$ ) 3567 (br), 2961, 2936, 2887, 2860, 1746, 1472, 1393, 1369, 1253, 1159, 1131, 876, 839, 780;  **$^1\text{H}$  NMR** (300 MHz,  $\text{CDCl}_3$ )  $\delta$  3.98 (s, 1H), 2.68 (s, 1H), 1.4-1.6 (m, 4H), 1.47 (s, 9H), 0.86-0.91 (m, 6H), 0.91 (s, 9H), 0.06 (s, 3H), 0.04 (s, 3H);  **$^{13}\text{C}$  NMR** (100 MHz,  $\text{CDCl}_3$ )  $\delta$  171.0, 81.7, 76.2, 75.8, 28.0, 27.2, 26.8, 25.7, 18.1, 7.7, 7.6, -4.7, -5.4; TLC (20:1 hexanes/EtOAc)  $R_f$  0.26; **Anal.** Calcd. for  $\text{C}_{17}\text{H}_{36}\text{O}_4\text{Si}$ : C, 61.40; H, 10.91. Found: C, 61.05; H, 10.90.

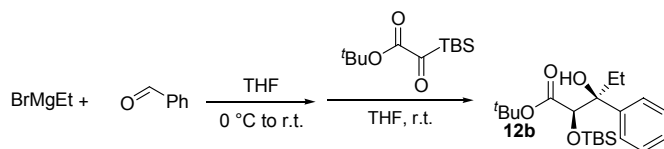

***Tert*-butyl-2-(*tert*-butyldimethylsilyloxy)-3-hydroxy-3-phenylpentanoate (12b).** The title compound was prepared according to General Procedure **E** using 100 mg (0.41 mmol) of *tert*-butyl *tert*-butyldimethylsilyl glyoxylate in THF (2 mL), 65 mg (0.61 mmol) of benzaldehyde in THF (2 mL), and 0.82 mL (0.82 mmol) of EtMgBr (1 M in THF). The crude product was purified by flash chromatography with 30:1-20:1 hexanes/EtOAc to afford 127 mg (81%) of the product as a clear oil (2:1 ratio of two diastereomers). Analytical data for title compound: **IR** (thin film,  $\text{cm}^{-1}$ ) 3463 (br), 2961, 2932, 2857, 1741, 1694, 1368, 1255, 1137, 876, 839, 780;  **$^1\text{H}$  NMR** (400 MHz,  $\text{CDCl}_3$ ) (major diastereomer)  $\delta$  7.17-7.46 (m, 5H), 4.17 (s, 1H), 3.73 (d,  $J = 1.2$  Hz, 1 H), 1.98 (sep,  $J = 7.2$  Hz, 2H), 1.27 (s, 9H), 0.84 (s, 9H), 0.70 (t,  $J = 7.2$  Hz, 3H), 0.08 (s, 3H), 0.04 (s, 3H);  **$^{13}\text{C}$  NMR** (100 MHz,  $\text{CDCl}_3$ ) (major diastereomer)  $\delta$  127.7, 126.2, 82.1, 79.3, 31.1, 27.7, 25.6, 7.5, -5.0, -5.7; TLC (20:1 hexanes/EtOAc)  $R_f$  (both diastereomers) 0.33; **Anal.** Combustion analysis failed. For  $^1\text{H}$  NMR spectrum, see the Appendix.

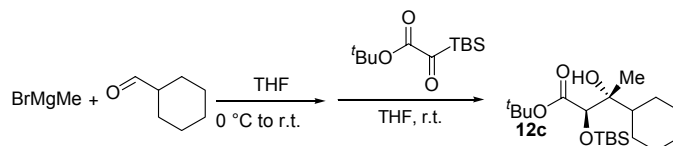

***Tert*-butyl 2-(*tert*-butyldimethylsilyloxy)-3-cyclohexyl-3-hydroxybutanoate (12c).**

The title compound was prepared according to General Procedure E using 100 mg (0.41 mmol) of *tert*-butyl *tert*-butyldimethylsilyl glyoxylate in THF (2 mL), 69 mg (0.61 mmol) of cyclohexylcarbaldehyde in THF (2 mL), and 0.82 mL (0.82 mmol) of EtMgBr (1 M in THF). The crude product was purified by flash chromatography with 30:1-20:1 hexanes/EtOAc to afford 102 mg (67%) of the product as a clear oil (3.5:1 ratio of two diastereomers). Analytical data for title compound: **IR** (thin film,  $\text{cm}^{-1}$ ) 3481 (br), 2928, 2857, 1745, 1723, 1472, 1368, 1257, 1144, 839, 778;  **$^1\text{H}$  NMR** (400 MHz,  $\text{CDCl}_3$ ) (major diastereomer)  $\delta$  4.01 (s, 1H), 1.60-1.94 (m, 6H), 1.48 (s, 9H), 1.09 (s, 3H), 0.91 (s, 9H), 0.06 (s, 3H), 0.04 (s, 3H);  **$^{13}\text{C}$  NMR** (100 MHz,  $\text{CDCl}_3$ ) (major diastereomer)  $\delta$  171.3, 81.7, 76.1, 44.1, 26.8, 26.7, 26.6, 25.7, 20.4, 18.1, -5.0, -5.7; TLC (20:1 hexanes/EtOAc)  $R_f$  (both diastereomers) 0.33; **Anal.** Calcd. for  $\text{C}_{20}\text{H}_{40}\text{O}_4\text{Si}$ : C, 64.47; H, 10.82. Found: C, 64.25; H, 10.89.

**General procedure (F) for Horner-Wadsworth-Emmons reactions (step 1 of stereochemical proof for Table 3).** A dry round bottomed flask with a magnetic stir bar was charged phosphonoacetate ester (1.0 equiv), and 5 mL of THF. To the resulting solution, sodium hydride (1.1 equiv) was added in one portion. The solution was stirred at room temperature for 30 minutes. To the reaction solution was added dropwise *via* cannula the ketone (1.0 equiv.) in 5 mL of THF. The resulting solution was stirred for 20 h. The product was then extracted from an aq. sat.  $\text{NaHCO}_3$  solution with 15 mL of ether. The organic layer was separated and the aqueous layer was extracted with two 10 mL portions of  $\text{Et}_2\text{O}$ . The organic extracts were combined and dried ( $\text{MgSO}_4$ ). Concentration of the organic phase by rotary evaporation afforded the crude product, which was purified by flash chromatography using the specified solvent system.

**General procedure (G) for lithium aluminum hydride reductions.** A dry round bottomed flask with a magnetic stir bar was charged lithium aluminum hydride (5.0 equiv), and 5 mL of THF at 0 °C. To the resulting solution the ester was added dropwise



(1.0 equiv) in 5 mL of THF. The solution was warmed to room temperature and stirred for 1.5 hours. To the solution was added X  $\mu\text{L}$  of  $\text{H}_2\text{O}$  where X is equivalent to the number of mg of lithium aluminum hydride used in the reaction. This was followed by the addition of X  $\mu\text{L}$  15% NaOH solution and then 5X  $\mu\text{L}$  of additional  $\text{H}_2\text{O}$ . The solid precipitates were filtered. Concentration of the organic phase by rotary evaporation afforded the crude product, which was purified by flash chromatography using the specified solvent system.

**General procedure (H) for dihydroxylations.** A dry round bottomed flask with a magnetic stir bar was charged with alkene (1.0 equiv), DABCO (0.3 equiv), 4-methylmorpholine N-oxide (2 equiv), methanesulfonamide (1 equiv) and acetone (20 ml). The solution was cooled to 0  $^\circ\text{C}$  and potassium osmate dihydrate (0.15 equiv in 1 mL  $\text{H}_2\text{O}$ ) was added dropwise followed by addition of t-BuOH (1.5 mL). The reaction was allowed to stir for 4 days and progress was monitored by TLC. When all starting material was consumed the homogenous solution was stirred with  $\text{Na}_2\text{SO}_3$  for 2 hours. The solution was then extracted with three 20 mL portions of  $\text{CH}_2\text{Cl}_2$ . Concentration of the organic phase by rotary evaporation afforded the crude product which was purified by flash chromatography using the specified solvent system.

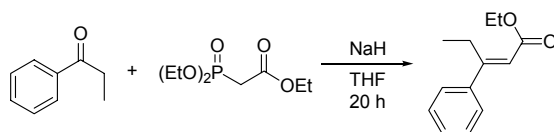

**(E)-ethyl 3-phenylpent-2-enoate.** The title compound was prepared according to General Procedure F using 1 g (7.5 mmol) of propiophenone, 1.69 g (7.5 mmol) of triethylphosphonoacetate, 199 mg NaH (8.3 mmol) and 10 mL of THF. The crude product was purified by flash chromatography with 20:1 hexanes/ether to afford 346 mg (24%) of the product as a clear oil. Analytical data for title compound:  $^1\text{H NMR}$  (400 MHz,  $\text{CDCl}_3$ )  $\delta$  7.34-7.44 (m, 5H), 6.0 (s, 1H), 4.2 (q,  $J = 7.2$  Hz, 2H), 3.09 (q,  $J = 7.2$  Hz, 2H), 1.30 (t,  $J = 7.2$  Hz, 3H), 1.06 (t,  $J = 7.2$  Hz, 3H); TLC (20:1 hexanes/ether)  $R_f$  (E) 0.29; the  $^1\text{H NMR}$  spectrum matched that reported previously.<sup>3</sup>

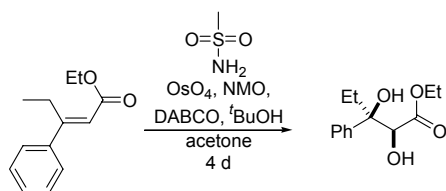

**Ethyl 2,3-dihydroxy-3-phenylpentanoate.** The title compound was prepared according to General Procedure **H** using 100 mg (0.53 mmol) of alkene, 29 mg (0.08 mmol) of potassium osmate dihydrate, 18 mg (0.15 mmol) of DABCO, 123 mg (1.05 mmol) of NMO, 50 mg (0.53 mmol) of methanesulfonamide, 1.5 mL <sup>t</sup>BuOH and 20 mL of acetone. The crude product was purified by flash chromatography with 5:1 hexanes/ether to afford 100 mg (80%) of the product as a clear oil. Analytical data for title compound: <sup>1</sup>H NMR (400 MHz, CDCl<sub>3</sub>) δ 7.20-7.46 (m, 5H), 4.35 (s, 1H), 4.15 (q, *J* = 7.2 Hz, 2H), 1.99 (dq, *J* = 7.2 Hz, 1H), 1.93 (dq, *J* = 7.2 Hz, 1H) 1.14 (t, *J* = 7.2 Hz, 3H), 0.80 (t, *J* = 7.2 Hz, 3H).

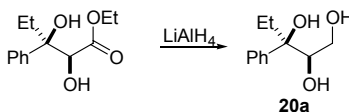

**3-phenylpentane-1,2,3-triol (20a).** The title compound was prepared according to General Procedure **G** using 100 mg (0.26 mmol) of diol, 50 mg (1.3 mmol) of lithium aluminum hydride, and 1.5 mL of THF. The crude product was purified by flash chromatography with ethyl acetate to afford 35 mg (56%) of the product as a clear oil. Analytical data for title compound: **IR** (thin film, cm<sup>-1</sup>) 3410 (br), 2969, 2939, 2881, 1647, 1600, 1447, 1071, 1026, 702; <sup>1</sup>H NMR (400 MHz, CDCl<sub>3</sub>) δ 7.2-7.40 (m, 5H), 3.77-3.85 (m, 3H), 3.12 (s, 1H), 2.62-2.68 (m, 2H), 1.83 (q, *J* = 9.6 Hz, 2H), 0.67 (t, *J* = 9.6 Hz, 3H); <sup>13</sup>C NMR (100 MHz, CDCl<sub>3</sub>) δ 143.1, 128.67, 128.54, 128.48, 126.1, 125.9, 79.4, 63.1, 30.5, 7.8; TLC (ethyl acetate) R<sub>f</sub> 0.37; CSP-SFC analysis: Chiralpak AS, 0-10% MeOH (ramp 0.5%/min), 1.5 mL/min, 150 bar, 40 °C, 240 nm, *t*<sub>r</sub> 19.8, 20.3 min; **Anal.** Calcd. for C<sub>11</sub>H<sub>16</sub>O<sub>3</sub>: C, 67.32; H, 8.22. Found: C, 67.03; H, 8.24.

This material was compared (using SFC analysis) to the mixture of **20a/20b** prepared from reduction of **12b**. See the Appendix for the SFC traces.

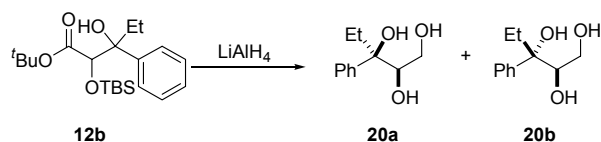

**3-phenylpentane-1,2,3-triol (20a/b).** The title compound was prepared according to General Procedure **G** using 115 mg (0.30 mmol) of **12b**, 57 mg (1.5 mmol) of lithium aluminum hydride, and 1.5 mL of THF. The crude product was purified by flash chromatography with ethyl acetate to afford 45 mg (63%) of the product as a clear oil. Analytical data for title compound:  $^1\text{H NMR}$  (400 MHz,  $\text{CDCl}_3$ ) (major diastereomer)  $\delta$  7.2-7.40 (m, 5H), 3.77-3.85 (m, 3H), 3.12 (s, 1H), 2.62-2.68 (m, 2H), 1.83 (q,  $J = 9.6$  Hz, 2H), 0.67 (t,  $J = 9.6$  Hz, 3H); TLC (ethyl acetate)  $R_f$  0.37; CSP-SFC analysis: Chiralpak AS, 0-10% MeOH. (ramp 0.5%/min), 1.5 mL/min, 150 bar, 40 °C, 240 nm,  $t_r$ (major) 20.0, 20.6 min,  $t_r$ (minor) 17.6, 19.1 min; **Anal.** See above.

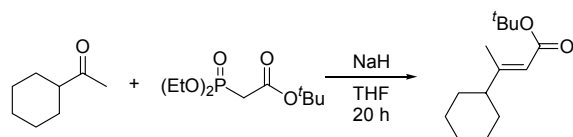

**(E)-tert-Butyl 3-cyclohexylbut-2-enoate.** The title compound was prepared according to General Procedure **F** using 0.67 g (5.3 mmol) of ketone, 1.34 g (5.3 mmol) of *tert*-Butyl diethyl phosphonoacetate, 146 mg of NaH (6.1 mmol) and 10 mL of THF. The crude product was purified by flash chromatography with 99:1-20:1 hexanes/ether to afford 760 mg (64%) of the product *E* isomer, as a clear oil. Analytical data for title compound: **IR** (thin film,  $\text{cm}^{-1}$ ) 3500 (br), 2977, 2928, 2854, 1720, 1642, 1450, 1366, 1237, 1142;  $^1\text{H NMR}$  (400 MHz,  $\text{CDCl}_3$ )  $\delta$  5.54 (s, 1H), 2.07 (s, 3H), 1.64-1.94 (m, 6H), 1.45 (s, 9H), 1.1-1.29 (m, 5H),  $^{13}\text{C NMR}$  (100 MHz,  $\text{CDCl}_3$ )  $\delta$  166.9, 163.1, 115.7, 79.3, 49.0, 31.3, 30.8, 28.3, 26.5, 26.4, 17.1; TLC (20:1 hexanes/ether)  $R_f$  (*E*) 0.30. For the NOESY spectrum, see the Appendix.

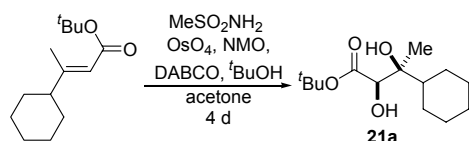

***Tert*-butyl 3-cyclohexyl-2,3-dihydroxybutanoate (21a).** The title compound was prepared according to General Procedure **H** using 200 mg (0.89 mmol) of alkene, 49 mg

(0.13 mmol) of potassium osmate dihydrate, 30 mg (0.15 mmol) of DABCO, 209 mg (1.05 mmol) of NMO, 84 mg (0.53 mmol) of methanesulfonamide, 2.6 mL *t*BuOH and 34 mL of acetone. The crude product was purified by flash chromatography with 5:1 hexanes/ether to afford 147 mg (64%) of the product as a clear oil. Analytical data for title compound: **IR** (thin film,  $\text{cm}^{-1}$ ) 3378 (br), 2974, 2919, 2851, 1729, 1367, 1151;  **$^1\text{H}$  NMR** (400 MHz,  $\text{CDCl}_3$ )  $\delta$  4.04 (d,  $J = 6.8$  Hz, 1H), 3.09 (d,  $J = 6.8$  Hz, 1H), 2.23 (s, 1H), 1.62-1.88 (m, 6H) 1.50 (s, 9H), 1.13-1.24 (m, 5H), 1.08 (s, 3H);  **$^{13}\text{C}$  NMR** (100 MHz,  $\text{CDCl}_3$ )  $\delta$  74.17, 44.0, 28.06, 27.8, 26.7, 26.6, 26.5, 26.2, 19.3; TLC (10:1 hexanes:EtOAc)  $R_f$  0.2; **Anal.** Combustion analysis failed. For the  $^1\text{H}$  NMR spectrum, see the Appendix.

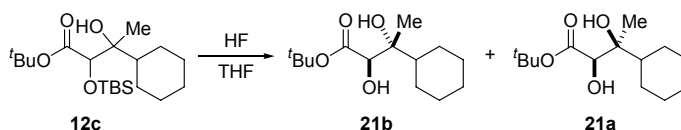

***Tert*-butyl 3-cyclohexyl-2,3-dihydroxybutanoate (21a/b).** The title compound was prepared by adding 22 mg (0.06 mmol) of **12c**, 2 mL HF (49% aq.) and 2 mL of THF to a round bottom flask. The solution was stirred overnight and the crude product was isolated as a clear oil. Upon comparison of the  $^1\text{H}$  NMR spectrum with the spectrum of **21a** derived from dihydroxylation of the (*E*)-alkene, it was determined that the major isomer had the *anti* orientation.  $^1\text{H}$  NMR data for **21b** (400 MHz,  $\text{CDCl}_3$ ) (major diastereomer)  $\delta$  3.99 (d,  $J = 6.4$  Hz, 1H), 3.07 (m, 1H), 2.23 (s, 1H), 1.62-1.88 (m, 6H) 1.51 (s, 9H), 1.13-1.24 (m, 5H), 1.11 (s, 3H); TLC (10:1 hexanes:EtOAc)  $R_f$  0.2.

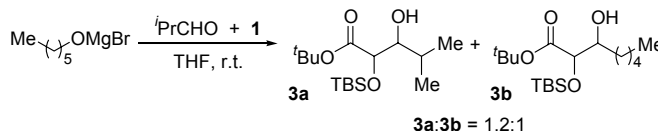

**Crossover experiment.** A dry round-bottomed flask with a magnetic stir bar was charged with 51 mg (0.50 mmol) of hexanol, and 2 mL of THF. To the resulting solution, 0.66 mL (0.66 mmol) of EtMgBr (1 M in THF) was added *via* syringe at 0 °C under Ar. The reaction temperature was allowed to warm to 25 °C for 5 min. To the reaction solution was added dropwise *via* cannula 81 mg (0.33 mmol) of *tert*-butyl *tert*-butyldimethylsilyl glyoxylate and 28 mg (0.40 mmol) of isobutyraldehyde in 2 mL of

THF. The reaction was stirred at the same temperature for 5 min before 5 mL of a saturated NH<sub>4</sub>Cl solution and 15 mL of Et<sub>2</sub>O were added. The organic layer was separated and the aqueous layer was extracted with two 10 mL portions of Et<sub>2</sub>O. The organic extracts were combined, dried (Na<sub>2</sub>SO<sub>4</sub>), and the solvent was removed with a rotary evaporator. The product ratio (**3a:3b**) was determined by <sup>1</sup>H NMR spectroscopy. For <sup>1</sup>H NMR data, see the Appendix.

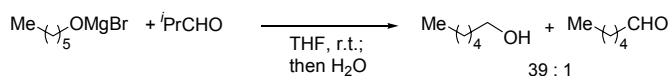

**Control experiment for the crossover study.** A dry round-bottomed flask with a magnetic stir bar was charged with 54 mg (0.53 mmol) of hexanol, and 2 mL of THF. To the resulting solution, 0.70 mL (0.70 mmol) of EtMgBr (1 M in THF) was added *via* syringe at 0 °C under an argon atmosphere. The reaction was allowed to warm to 25 °C for 5 min. To the reaction solution was added *via* cannula 38 mg (0.53 mmol) of isobutyraldehyde in 2 mL of THF. The reaction was stirred at the same temperature for 3 min before 5 mL of a saturated NH<sub>4</sub>Cl solution and 15 mL of Et<sub>2</sub>O were added. The organic layer was separated, washed (H<sub>2</sub>O and brine), and dried (Na<sub>2</sub>SO<sub>4</sub>). The organic solution was examined directly by gas chromatography (oven temperature = 120 °C; run time = 15 min).

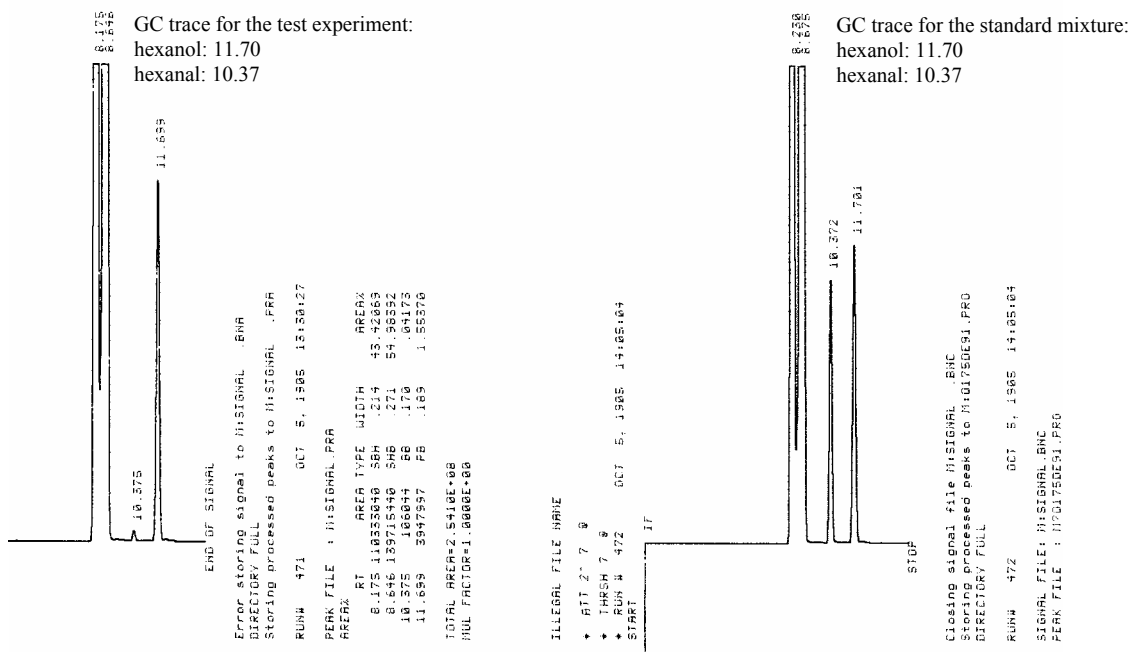

# Appendix

<sup>1</sup>H NMR in CDCl<sub>3</sub> for **11**

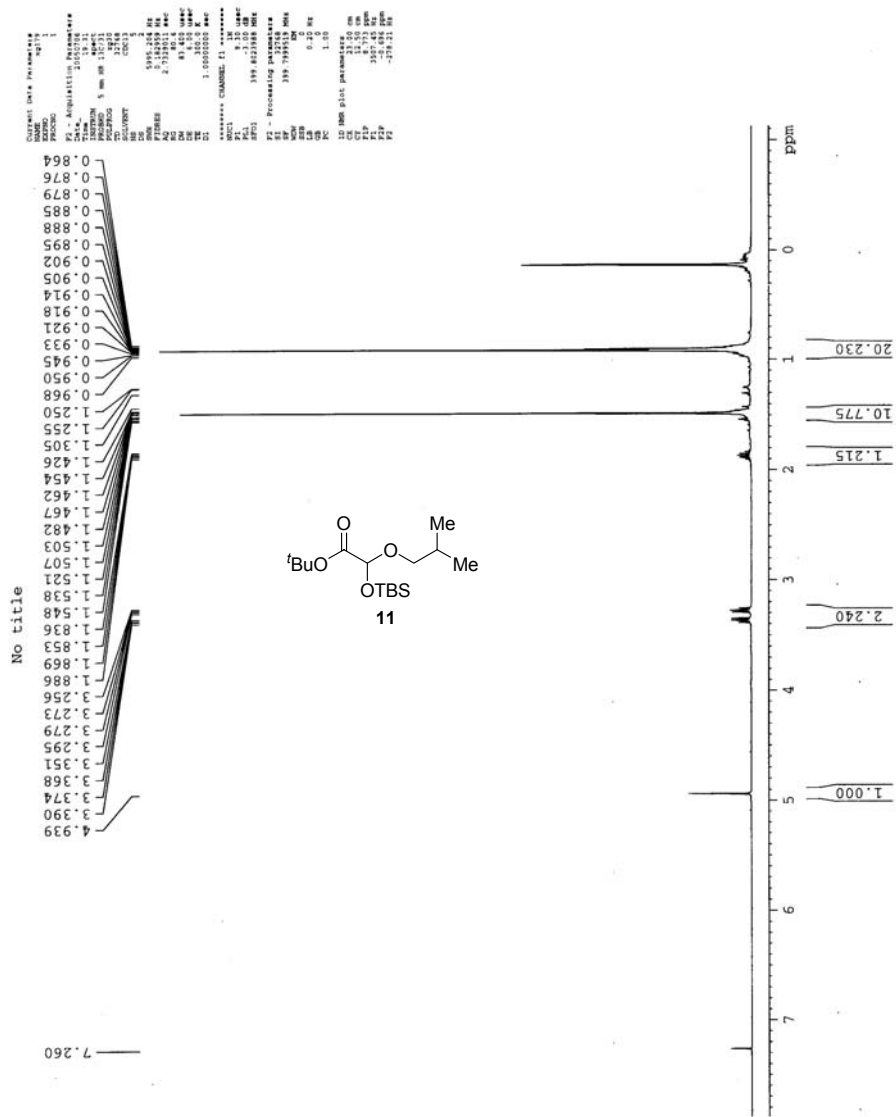

# Identification of Relative Stereochemistry of Both Diastereomers.

<sup>1</sup>H NMR in CDCl<sub>3</sub> for major diastereomer **13a**

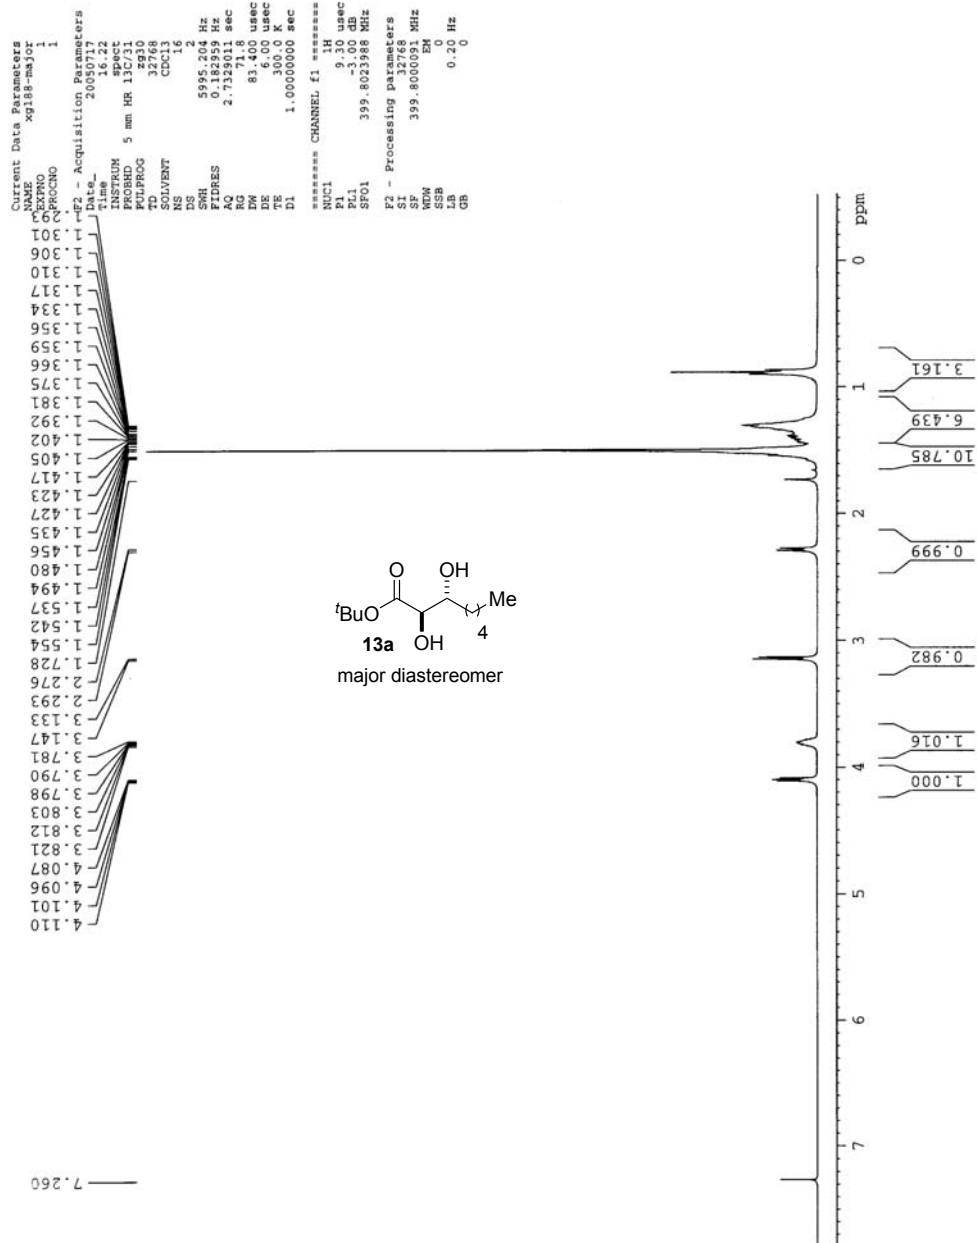

<sup>1</sup>H NMR in CDCl<sub>3</sub> for minor diastereomer **13b**

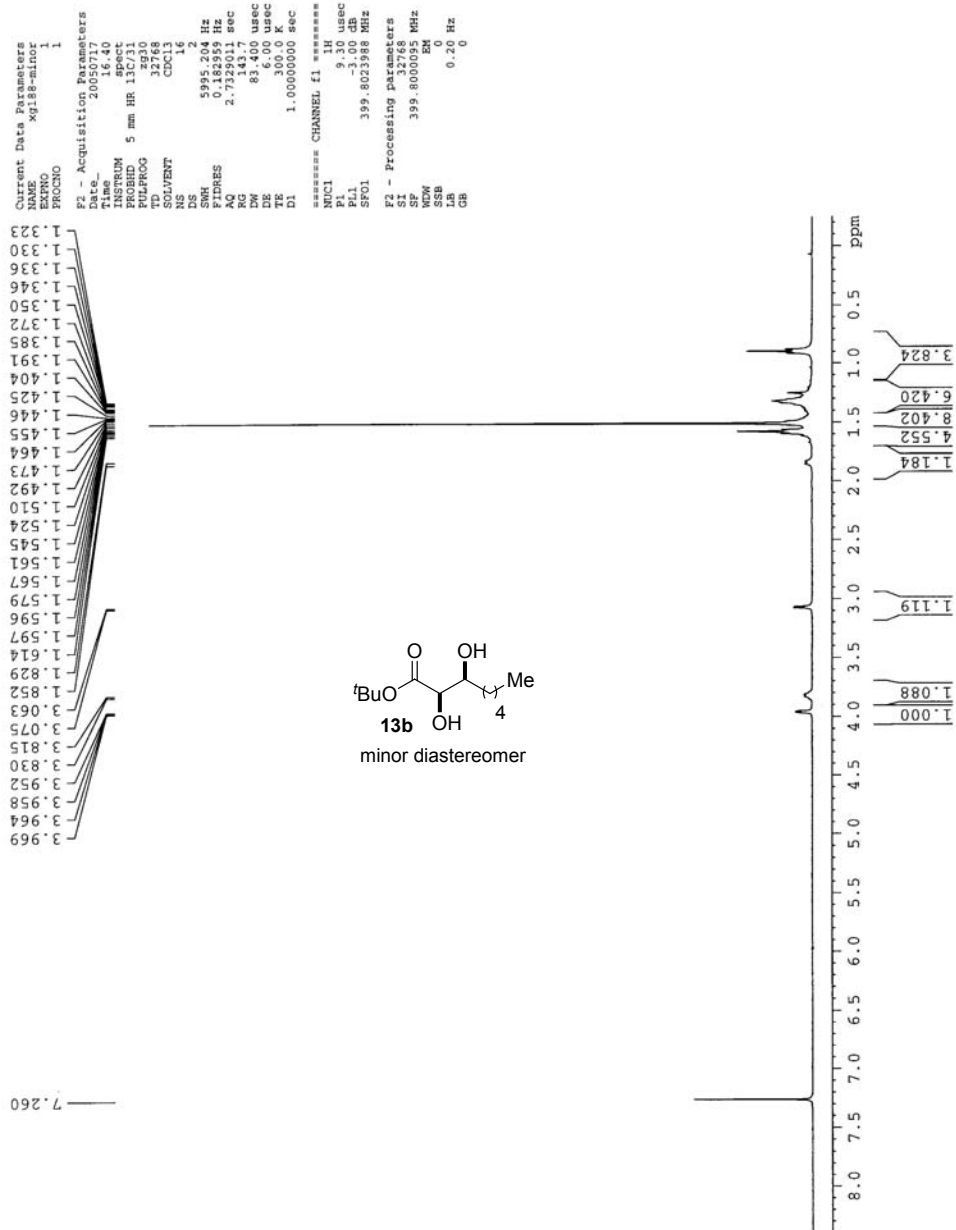



<sup>1</sup>H NMR in CDCl<sub>3</sub> for 17

```

Current Data Parameters
NAME          xh031
EXPNO         1
PROCNO        1
F2 - Acquisition Parameters
Date_         20051120
Time          15.21
INSTRUM       spect
PROBHD        5 mm HR 13C/7
PULPROG       zgpg30
TD            32768
SOLVENT       CDCl3
NS            16
DS            2
SWH           5995.20 Hz
FIDRES        0.187959 Hz
AQ            2.7329011 sec
RG            71.8
DM            83.400 usec
DE            6.00 usec
TE            300.0 K
D1            1.00000000 sec

***** CHANNEL f1 *****
NUC1          1H
P1            9.10 usec
PL1           -3.00 dB
SFO1          399.8023988 MHz

F2 - Processing parameters
SI            32768
SF            399.8000089 MHz
WDW           EM
SSB           0
LB            0.20 Hz
GB            0
  
```

4.430  
4.414  
3.875  
3.859  
3.851  
3.835  
2.263  
1.785  
1.777  
1.769  
1.761  
1.752  
1.745  
1.736  
1.728  
1.712  
1.613  
1.577  
1.535  
1.528  
1.478  
1.440  
1.433  
1.424  
1.418  
1.352  
1.317  
1.246  
1.042  
1.026  
1.011  
1.001  
0.994  
0.986  
0.976

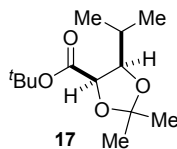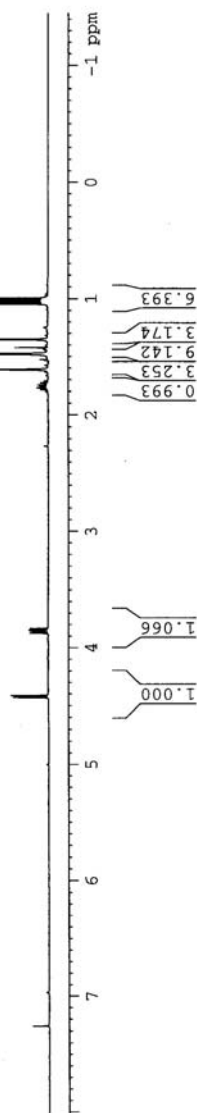

NOESY in CDCl<sub>3</sub> for 17

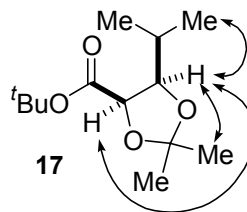

```
Current Data Parameters
=====
EXPNO 1
PROCNO 1
F2 - Acquisition Parameters
Time 21.19
PROBHD 5 mm HR 1B/CP1
PULPROG zgpg30
SOLVENT cdcl3
DS 4
AQ 0.16
RG 1.94621 Hz
AQ 0.250722 sec
DM 122.400 us/c
TE 300.0 K
DE 0.0000100 sec
DD 0.0000001 sec
DS 0.0000001 sec
G3 0.0000001 sec
G30 0.0000001 sec
MORSE 1.0000000 sec
MORSE 1.0000000 sec
===== CHANNEL f1 =====
NUC1 13C
P1 9.30 us/c
PT 18.60 us/c
SFO1 399.801592 MHz
===== CHANNEL f2 =====
GRABF1
GRABF2
GRABF3
GRABF4
GRABF5
GRABF6
GRABF7
GRABF8
GRABF9
GRABF10
GRABF11
GRABF12
GRABF13
GRABF14
GRABF15
GRABF16
GRABF17
GRABF18
GRABF19
GRABF20
===== CHANNEL f3 =====
NUC3 1H
P3 199.826 MHz
PT 3.99826 MHz
SFO3 500.1361992 MHz
===== Acquisition Parameters =====
SFO1 399.826 MHz
SFO2 125.7615000 MHz
SFO3 500.1361992 MHz
=====
```

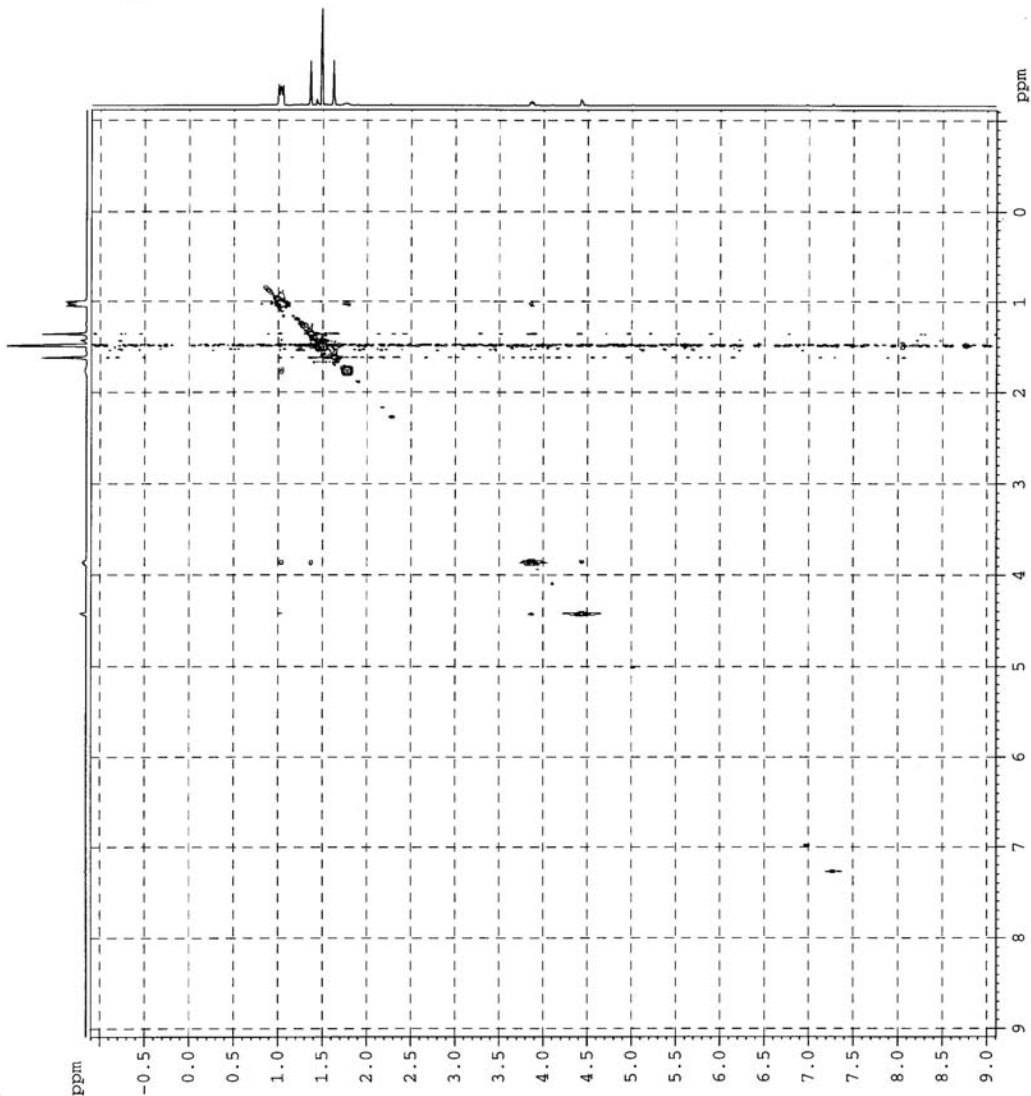

<sup>1</sup>H NMR in CDCl<sub>3</sub> for 18

Current Data Parameters  
NAME XH032  
EXPNO 1  
PROCNO 1  
F2 - Acquisition Parameters  
Date\_ 20051122  
Time 19.45  
INSTRUM spect  
PROBHD 5 mm HR 13C/31  
PULPROG zgpg30  
SOLVENT CDCl3  
NS 2  
DS 2  
SWH 5995.204 Hz  
FIDRES 0.182959 Hz  
AQ 2.7229011 sec  
RG 101.6  
DW 83.400 usec  
DE 19.00 usec  
TE 300.0 K  
D1 1.00000000 sec  
\*\*\*\*\* CHANNEL f1 \*\*\*\*\*  
NUC1 1H  
P1 9.30 usec  
PL 0.00 dB  
SFO1 399.8023988 MHz  
F2 - Processing parameters  
SI 32768  
SF 399.8000086 MHz  
WDW EM  
SSB 0  
GB 0.00 Hz

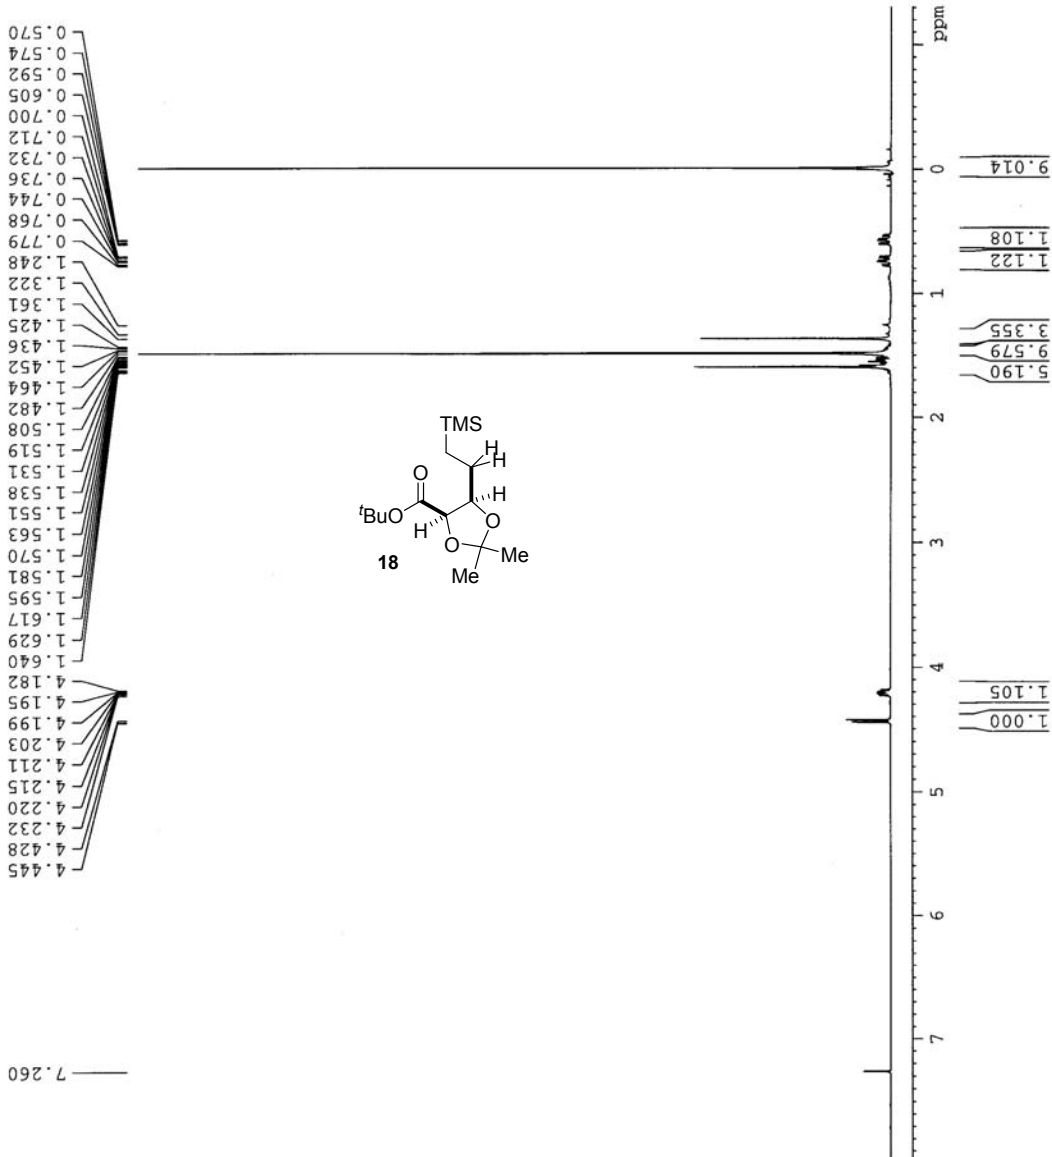



<sup>1</sup>H NMR in CDCl<sub>3</sub> for 19

```

Current Data Parameters
NAME      XH037
EXPNO    1
PROCNO   1

F2 - Acquisition Parameters
Date_    20051111
Time     20.01
INSTRUM  spect
PROBHD   5 mm HR 13C/31
PULPROG  zg30
TD        32768
NS        128
DS        4
SOLVENT  CDCl3
NS2       2
SMH       5995.204 Hz
FIDRES   0.182959 Hz
AQ        2.7329011 sec
RG         71.8
RW         83.400 usec
DE         6.00 usec
TE        300.0 K
D1        1.00000000 sec

===== CHANNEL F1 =====
NUC1      1H
P1        9.00 usec
PL1       0.00 dB
SFO1      399.802398 MHz

F2 - Processing parameters
SI         32768
SF         399.8000091 MHz
WDW        EM
SSB        0
LB         0.20 Hz
GB         0
    
```

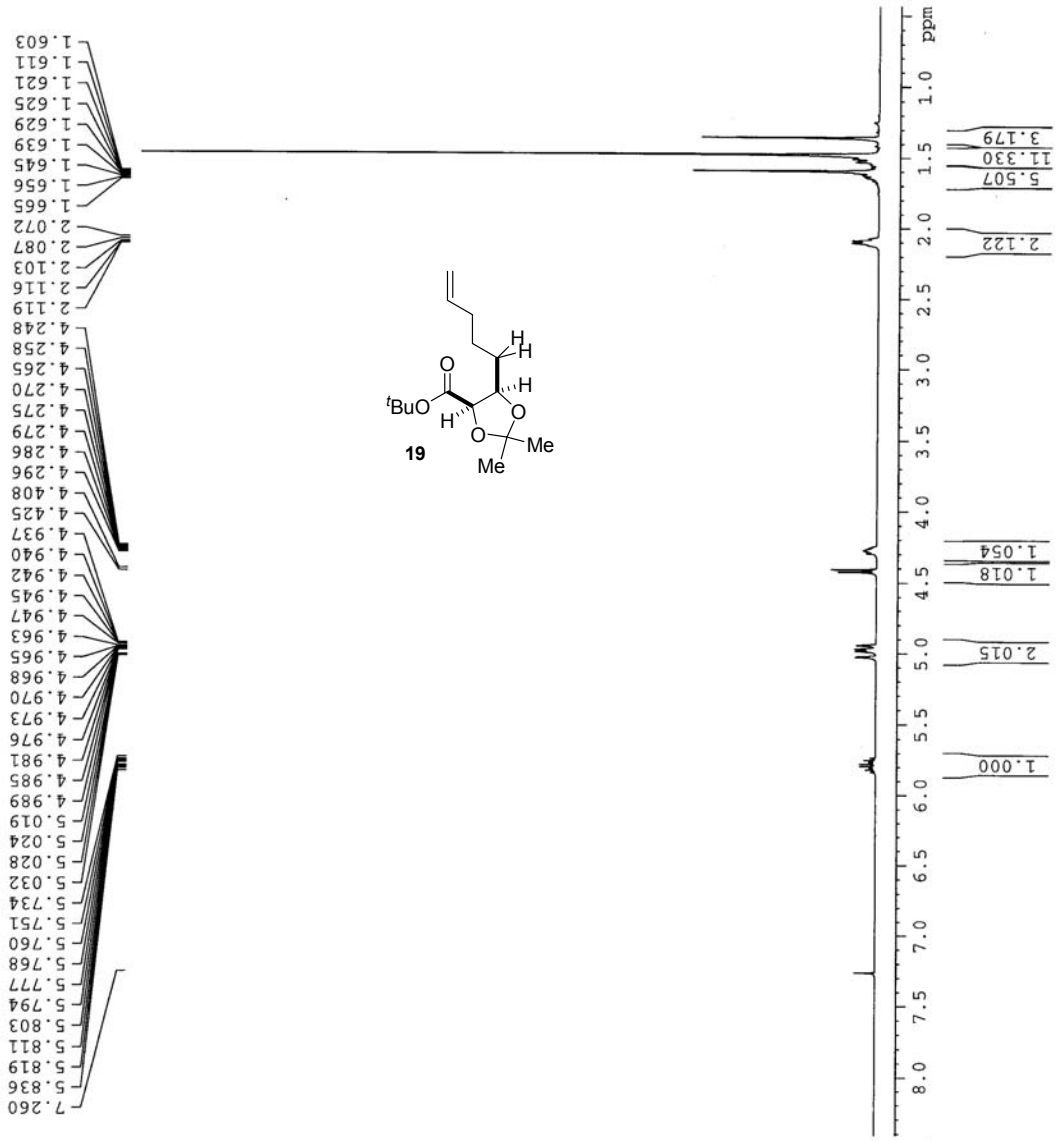

NOESY NMR in CDCl<sub>3</sub> for **19**

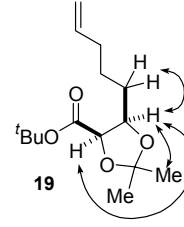

```

Current Data Parameters
NAME      Abz2Theory
PROCNO    1
-----
F2 - Acquisition Parameters
Date_     20051111
Time      12:46
INSTRUM   5 mm BR-13C/31
PROBHD    EPRB072048
TD        65536
SOLVENT   CDCl3
NUC1       13C
NUC2       31P
AQ        395.16 Hz
FIDRES    1.753884 Hz
RG         119.200 usec
IN        30.0 usec
TE        300.0 K
DE        0.0000000 sec
DB        0.80000001 Hz
GB        0.30000000 Hz
GC        0.30000000 Hz
GZ        0.0027791 Hz
NUC1REF   1.50000000 Hz
MCHW1     1.50000000 Hz
----- CHANNEL f1 -----
MUL1      8
PC        1K usec
P2        18.60 usec
PR1       399.613791 MHz
PFC1      SINE 150
SFO1      125.761153 MHz
----- CHANNEL f2 -----
CPDPRG2   SINE 150
SFO2      125.761153 MHz
CPDPRG1   SINE 150
SFO1      125.761153 MHz
-----
F1 - Acquisition Parameters
MUL1      8
PC        1K usec
P2        18.60 usec
PR1       399.613791 MHz
PFC1      SINE 150
SFO1      125.761153 MHz
PFC2      14.650683 Hz
SFO2      50.618357 MHz
-----
  
```

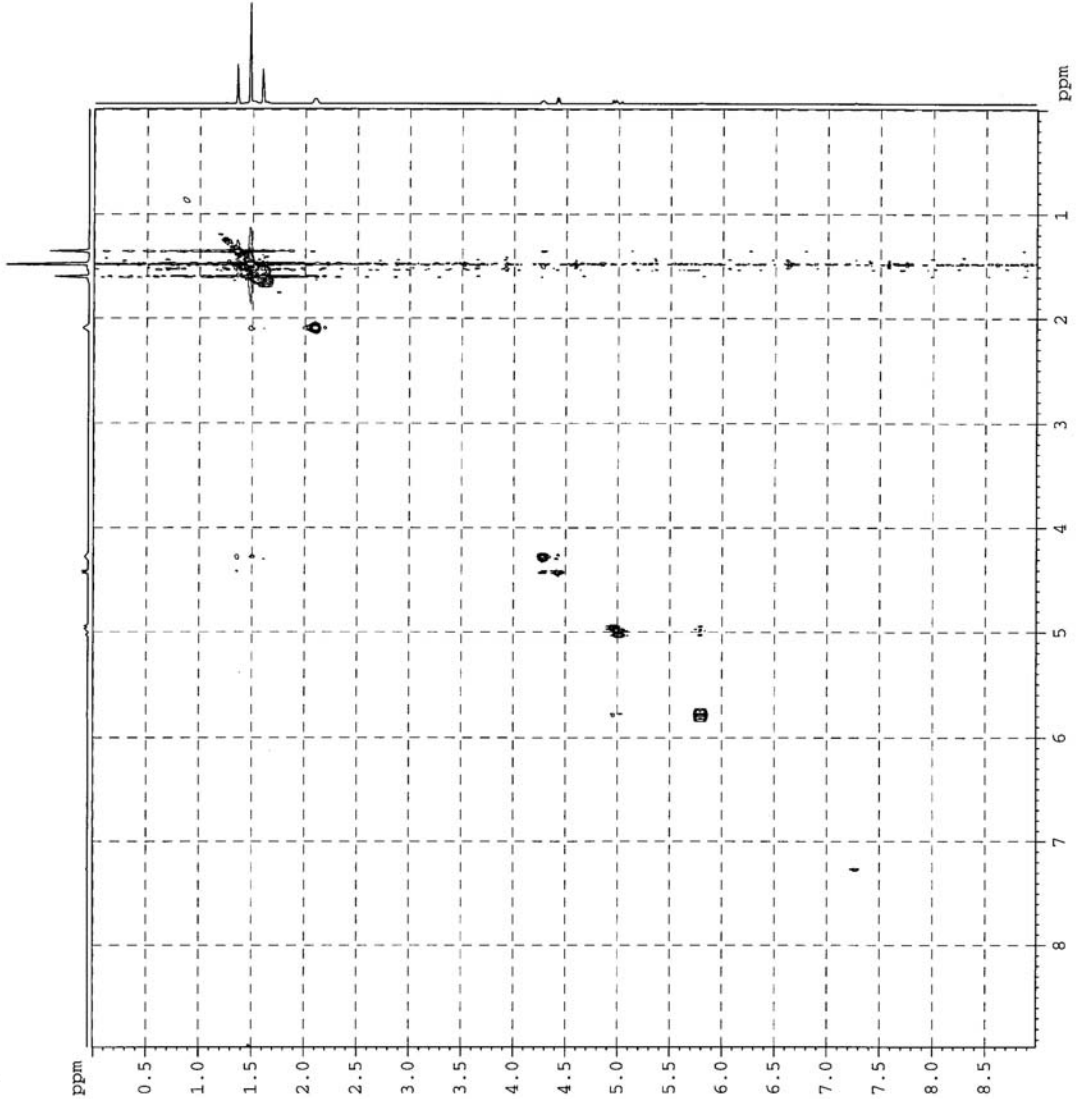

<sup>1</sup>H NMR in CDCl<sub>3</sub> for **12b**

Current Data Parameters  
 NAME AS-1-12bAClean  
 EXPNO 1  
 PROCNO 1

Acquisition Parameters  
 Date\_ 20051018  
 Time 08:27:00  
 INSTRUM spect  
 CHANNEL 5 mm HR 13C/31  
 PULPROG zgpg30  
 SOLVENT CDCl3  
 NS 16  
 DS 4  
 SWH 5995.204 Hz  
 FIDRES 0.182859 Hz  
 AQ 2.7129011 sec  
 IN 83.400 usec  
 DE 6.00 usec  
 TE 300.2 K  
 DI 1.0000000 sec

===== CHANNEL f1 =====  
 PUL1 zgpg30  
 F1 125.760 MHz  
 PC1 9.30 usec  
 PL1 -1.00 dB  
 SFO1 399.8023988 MHz

F2 - Processing parameters  
 SI 32768  
 SF 399.8000000 MHz  
 EQ 2  
 ASB 0  
 LB 0.20 Hz  
 GB 0

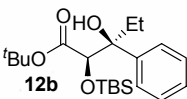

7.462  
7.444  
7.409  
7.391  
7.305  
7.287  
7.268  
7.249  
7.242  
7.240  
7.225  
7.206  
7.204  
7.189  
7.185  
7.168

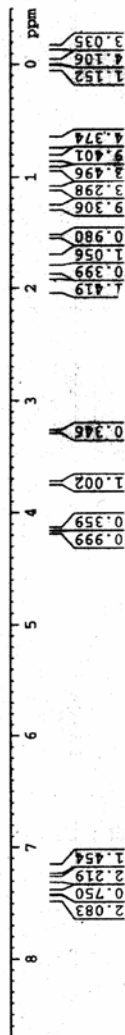

Chiral SFC Trace for **20a** (synthesized via dihydroxylation)

Print of window 38: Current Chromatogram(s)

Page 1 of

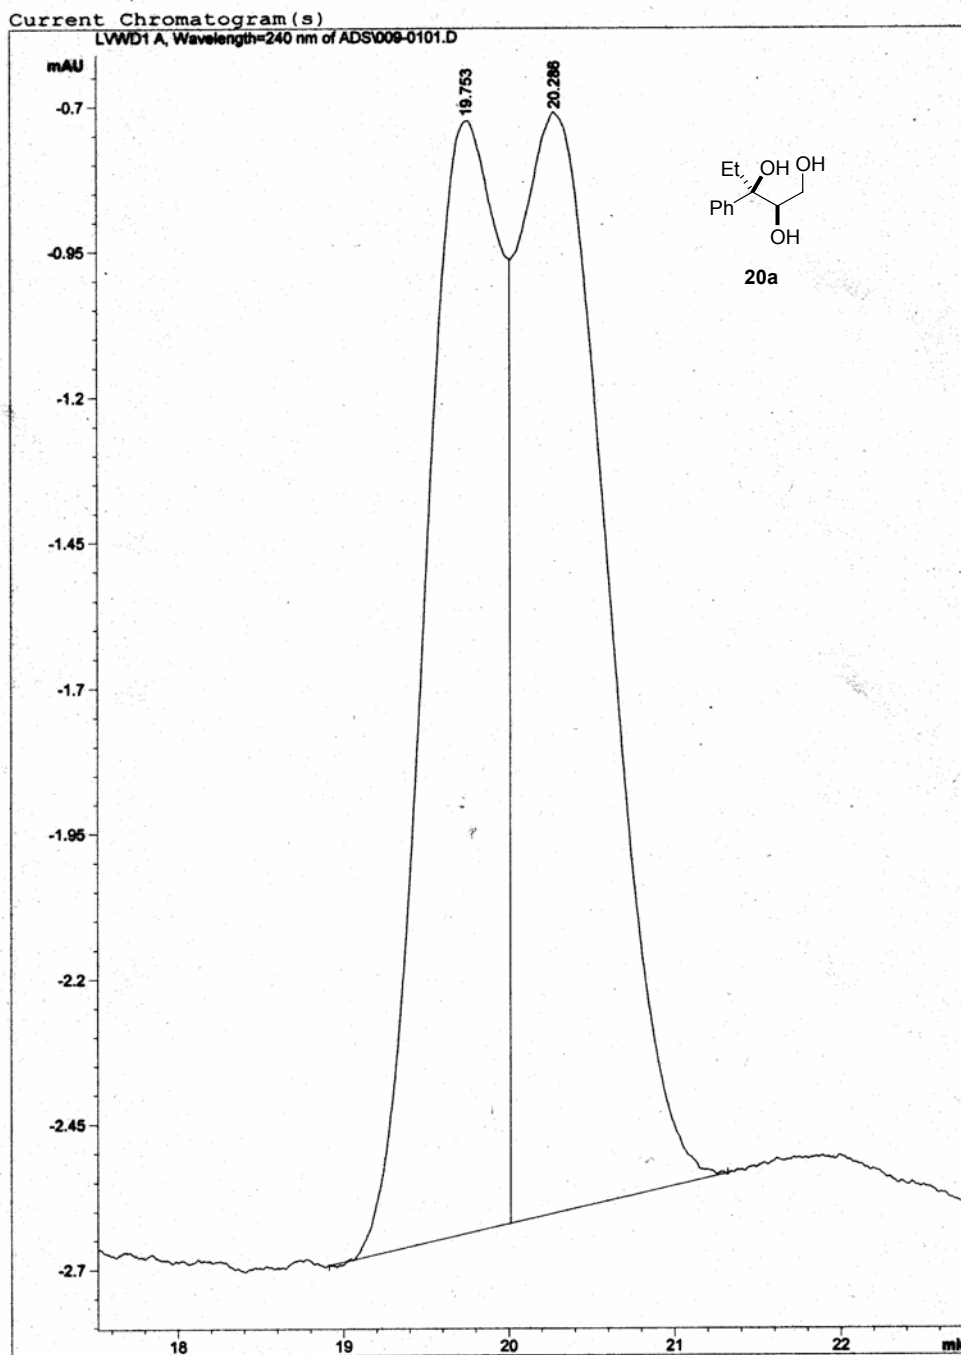

SFC 3D system Tuesday, March 21, 2006 6:19:09 PM by DAN



# Chiral SFC Trace for 20a and 20b derived from 12b

Print of window 38: Current Chromatogram(s)

Page 1 of

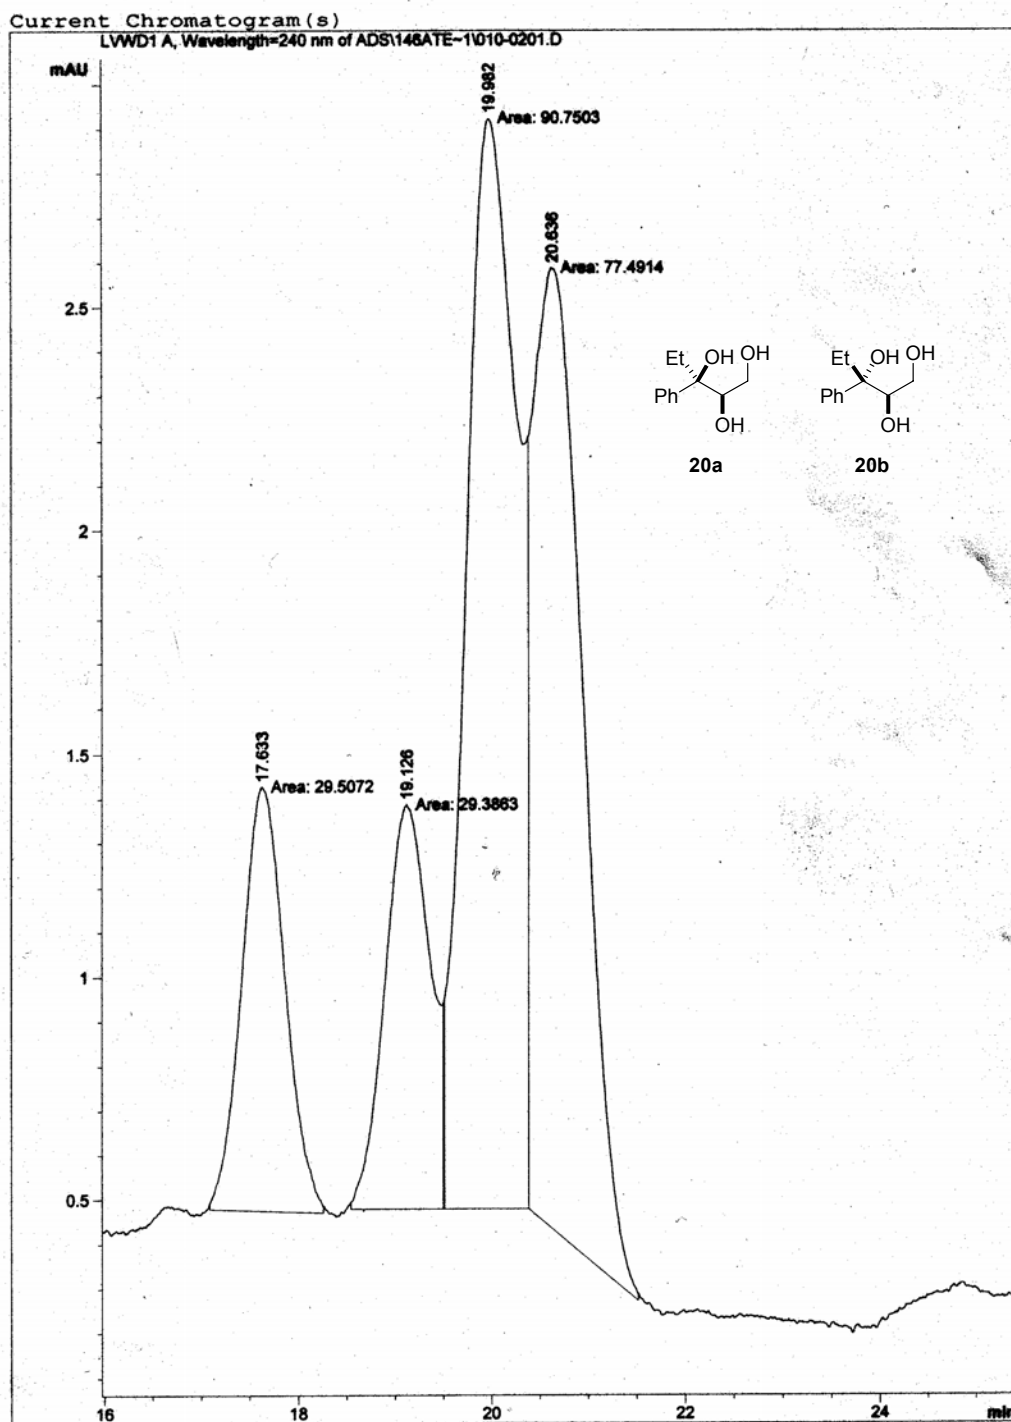

SFC 3D system Tuesday, March 21, 2006 6:13:11 PM by DAN

<sup>1</sup>H NMR in CDCl<sub>3</sub> of (*E*)-*tert*-butyl 3-cyclohexylbut-2-enoate

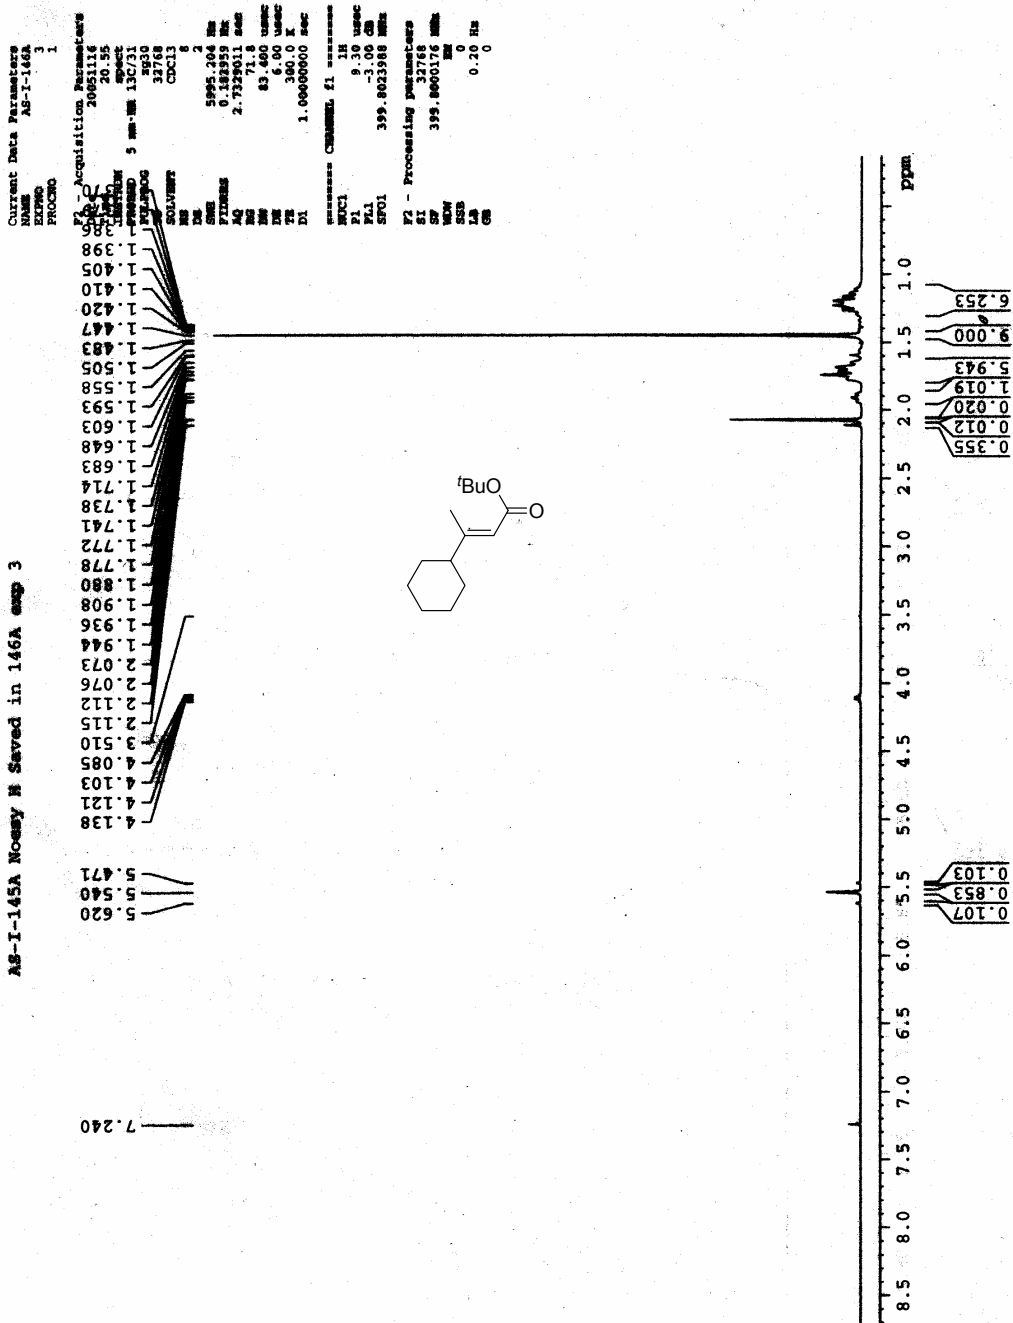

# NOESY in CDCl<sub>3</sub> of (*E*)-*tert*-butyl 3-cyclohexylbut-2-enoate

```

Current Data Parameters
EXPNO 1
PROCNO 1
P2 - Acquisition Parameters
Date_ 20060412
Time 12:11:11
INSTRUM spect
PROBHD 5 mm HR 13C/31
TD 65536
SOLVENT CDCl3
ES 16
SFRS 4084.567 Hz
AQ 0.2557532 sec
RG 32
DE 172.60 usec
TE 300.0 K
D1 0.0050000 sec
D2 1.5000000 sec
D3 0.0050001 sec
d40 0.3982999 sec
d50 0.0050000 sec
MCHEST 1.5000000 sec
===== CHANNEL f1 =====
NUC1 13C
P1 15.00 usec
PL1 18.50 dB
PL2 -3.00 dB
SFO1 399.801592 MHz
===== GRADIENT CHANNEL =====
GPNM2 0.00 %
GPNM1 0.00 %
GPN2 0.00 %
GPN1 0.00 %
P16 -40.00 %
P15 1500.00 usec
F1 - Acquisition Parameters
SFO1 399.8716 MHz
SFRS 15.95601 Hz
EN 17.249 ppm
  
```

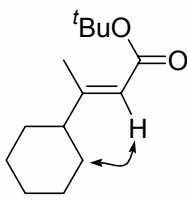

AD-1-1474 NOESY

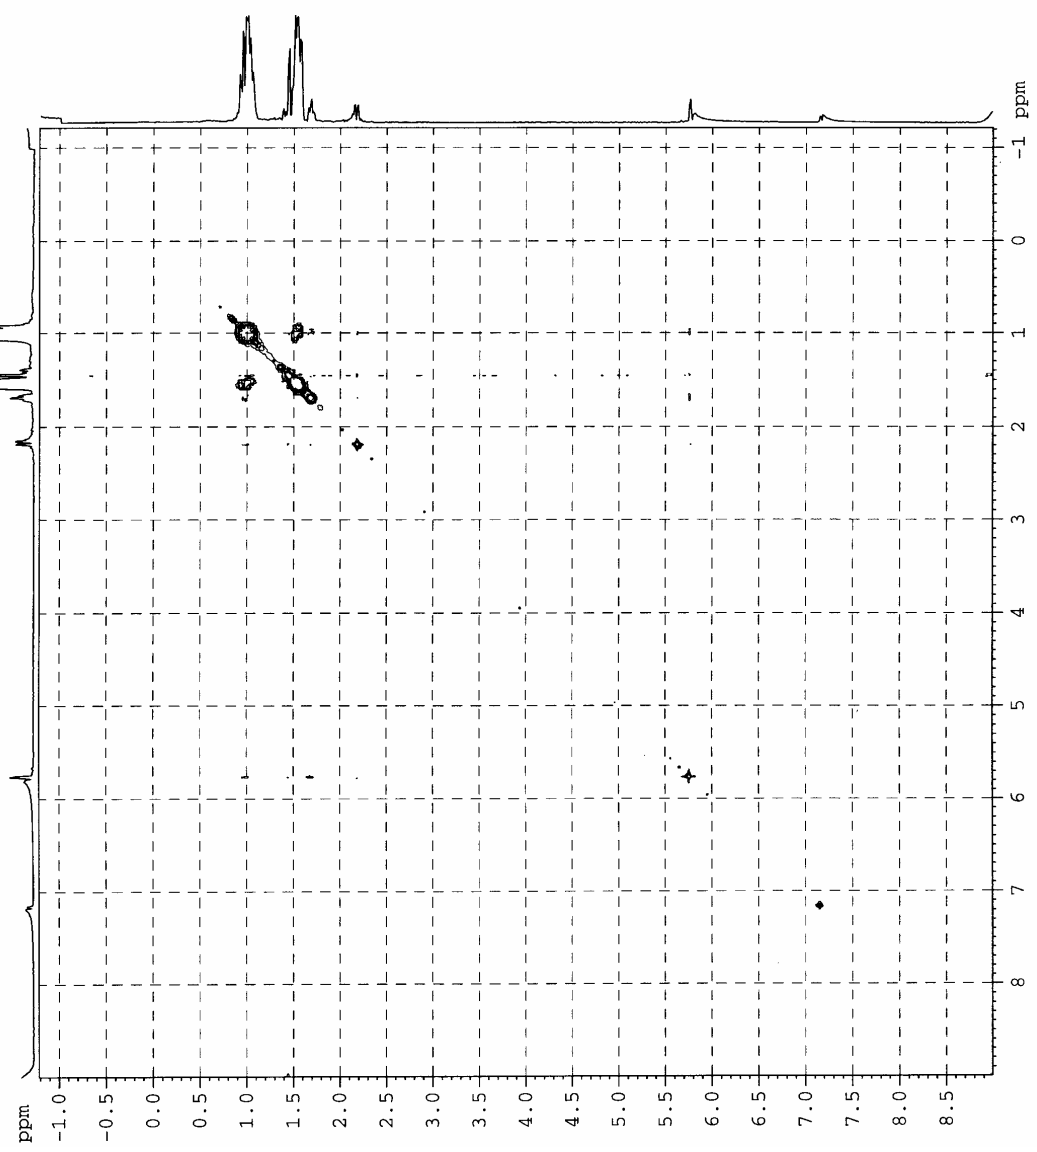

$^1\text{H}$  NMR in  $\text{CDCl}_3$  of **21a** derived from dihydroxylation of (*E*)-*tert*-butyl 3-cyclohexylbut-2-enoate

AS-I-147A Clean H1 400MHz WB

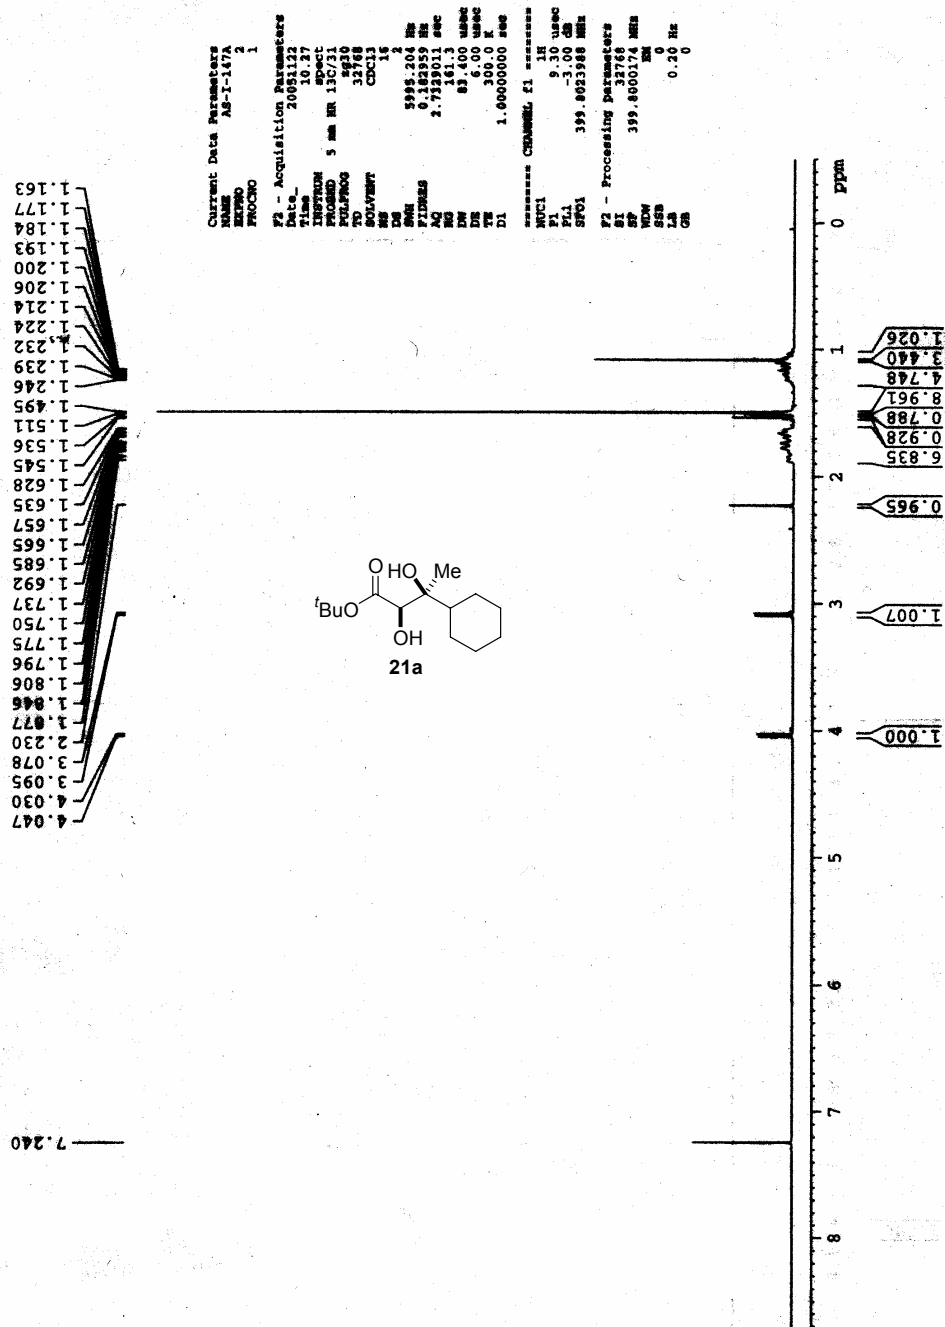

<sup>1</sup>H NMR in CDCl<sub>3</sub> of **21a** and **21b** derived from **12c**

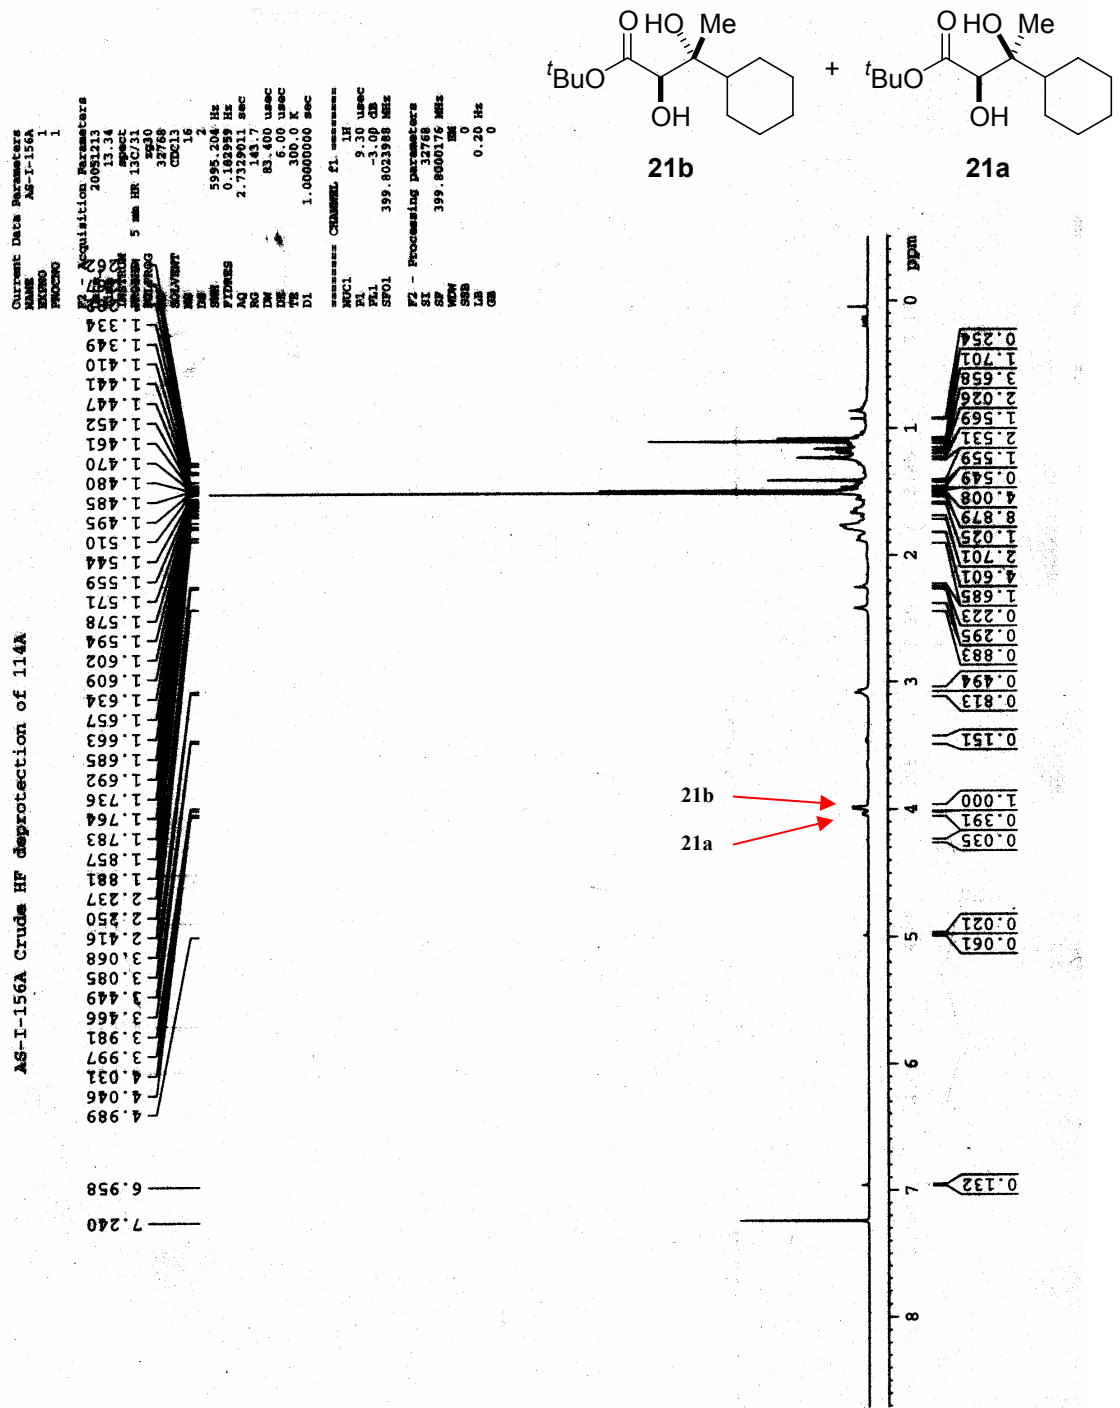

# <sup>1</sup>H NMR spectrum to evaluate crossover

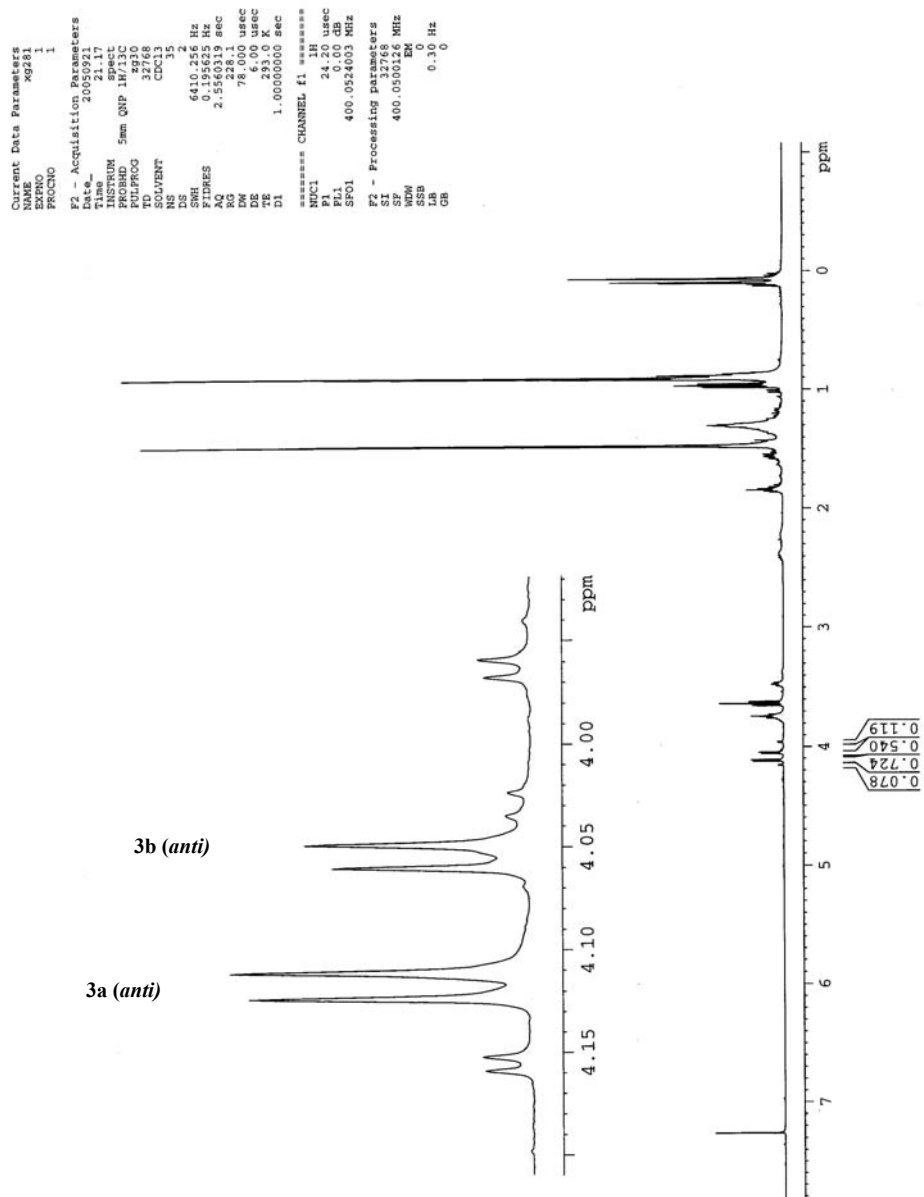

## References

1. Nicewicz, D. A.; Johnson, J. S. *J. Am. Chem. Soc.* **2005**, *127*, 6170-6171.
2. Bollbuck, B.; Kraft, P.; Tochtermann, W. *Tetrahedron* **1996**, *52*, 4581-4592.
3. Katritzky, A. R.; Feng, D.; Lang, H. *J. Org. Chem.* **1997**, *62*, 715-720.
